# Supplementary material for: Pleiotropy complicates a trade-off between phage resistance and antibiotic resistance
Source: PubMed Central journal article supplement (PMC7260982; doi:10.1073/pnas.1919888117), 2020-05-18
Supplement: pnas.1919888117.sapp.pdf [file pnas.1919888117.sapp.pdf]

# PNAS

[www.pnas.org](http://www.pnas.org)

Supplementary Information for

Pleiotropy complicates a trade-off between phage resistance and antibiotic resistance

Alita R. Burmeister, Abigail Fortier, Carli Roush, Adam J. Lessing, Rose G. Bender, Roxanna

Barahman, Raeven Grant, Benjamin K. Chan, Paul E. Turner

Alita R. Burmeister

Email: [alita.burmeister@yale.edu](mailto:alita.burmeister@yale.edu)

**This PDF file includes:**

Supplementary text  
Figures S1 to S4  
Tables S1 to S6  
Legends for Datasets S1 to S7  
SI References

**Other supplementary materials for this manuscript include the following:**

Datasets S1 to S7

## Supplementary Information Text

### Supplementary Results

**Analysis of additional evolved isolates.** Since tetracycline sensitivity did not fix in the + phage populations within 10 days of evolution, we expected that the tetracycline-resistant portion of the populations would be explained by presence of either ancestral (phage-sensitive) or LPS-related genotypes, as not all changes to LPS result in altered tetracycline resistance. To study the structure of the population fraction that remained tetracycline-resistant (ancestral phenotype), we additionally isolated tetracycline resistant bacteria from each population (Table S5) and assessed them for phage resistance and genome sequence changes.

Among the Tet<sup>R</sup> evolved isolates, we observed mutations in both *tolC* and LPS-synthesis gene *rfaP*. In one case, an isolate had no known phage resistance mutation and was phage sensitive, indicating the survival of the sensitive ancestral bacteria alongside the phage resistant bacteria, and providing a means for phage replication and persistence through the 10-day experiment.

### Supplementary Methods

**Kirby Bauer colistin disk diffusion assay.** Mueller Hinton plates were prepared by pipetting 25 mL of Mueller Hinton agar into each plate, then allowed to dry for two days. Plates were then used either immediately or refrigerated until use. Overnight bacterial cultures of each strain were prepared by incubating a single bacterial colony in 10 mL LB broth at 37°C for 18-20 hours. After incubation, 1:10 dilutions of each bacterial strain were prepared by combining 900 µL 0.85% NaCl solution with 100 µL bacterial inoculation. To prepare the disk diffusion plates, 100 µL of each bacterial dilution were pipetted onto a Mueller Hinton plate then spread evenly across the plate with a sterile plastic L spreader. Plates were then allowed to dry and cardboard colistin disks (ThermoFisher, # CT0017B) containing 10 µg colistin were placed in the center of the plates using sterile forceps. Plates were incubated for 20-24 hours at 37°C. Finally, to measure the diameters of the zones of inhibition (ZOI), three straight lines, each at a different angle, were drawn through the center of the ZOI using a ruler. The diameter of the ZOI was measured along the drawn lines.

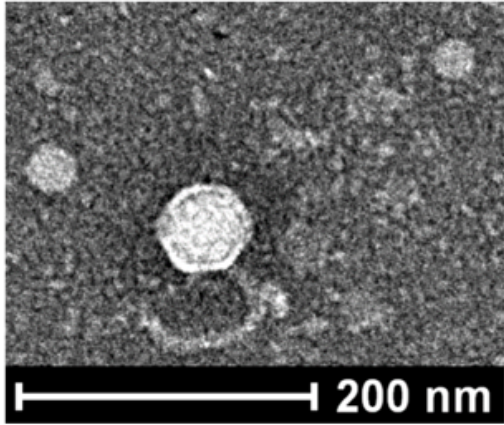

**Fig. S1.** Transmission electron micrograph showing phage U136B has a siphophage morphology.

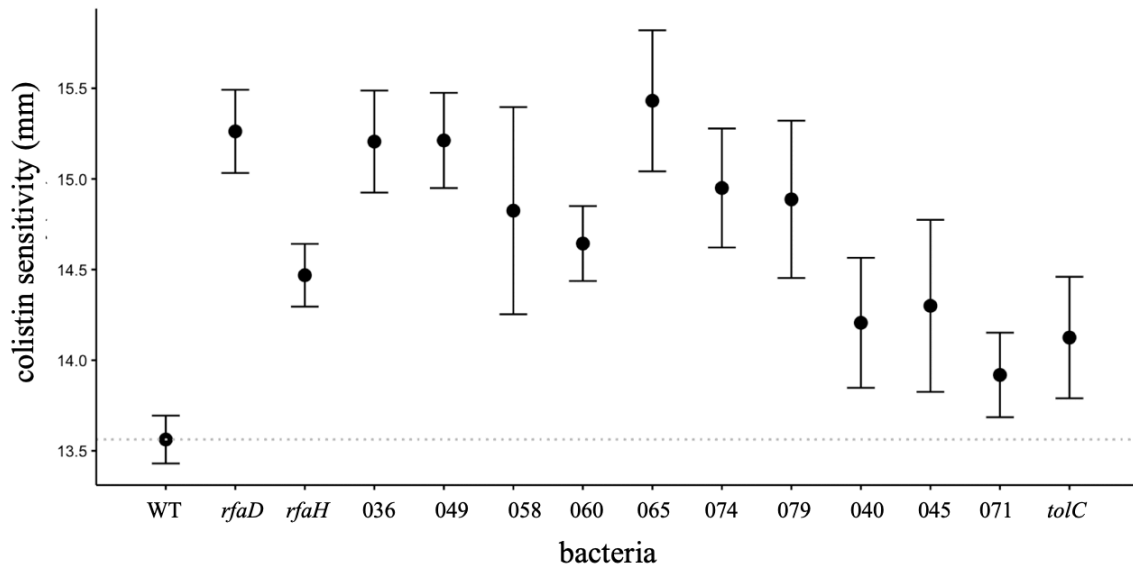

**Fig. S2.** Kirby-Bauer disk-diffusion assay measurements for colistin sensitivity have high variance but yield similar relative results to the microbroth dilution method. The control strains ( $\Delta rfaD$  and  $\Delta rfaH$ ) and phage resistant mutants (RGB-036 to RGB-079) had increased sensitivity to colistin compared to ancestor. Phage resistant mutants RGB-040, 045, and 071 contain *tolC* mutations (main text). Error bars show SEM of 11 to 19 independent measurements of each strain.

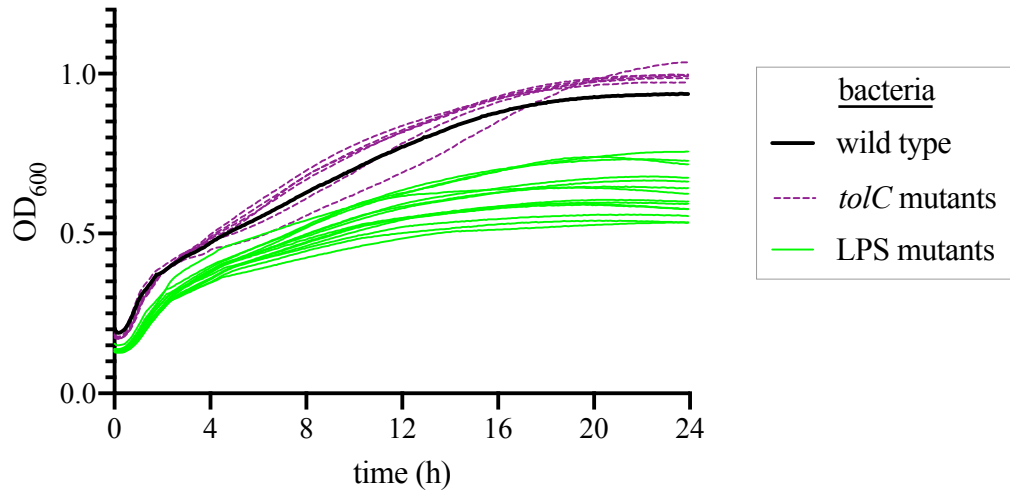

**Fig. S3.** Phage-resistant mutants vary in fitness costs. Bacterial growth curves include wild type bacteria (BW25113), *toIC* phage-resistant mutants, and LPS-related mutants listed in Table 2 of the main text. Each line shows the mean of three biological replicates.

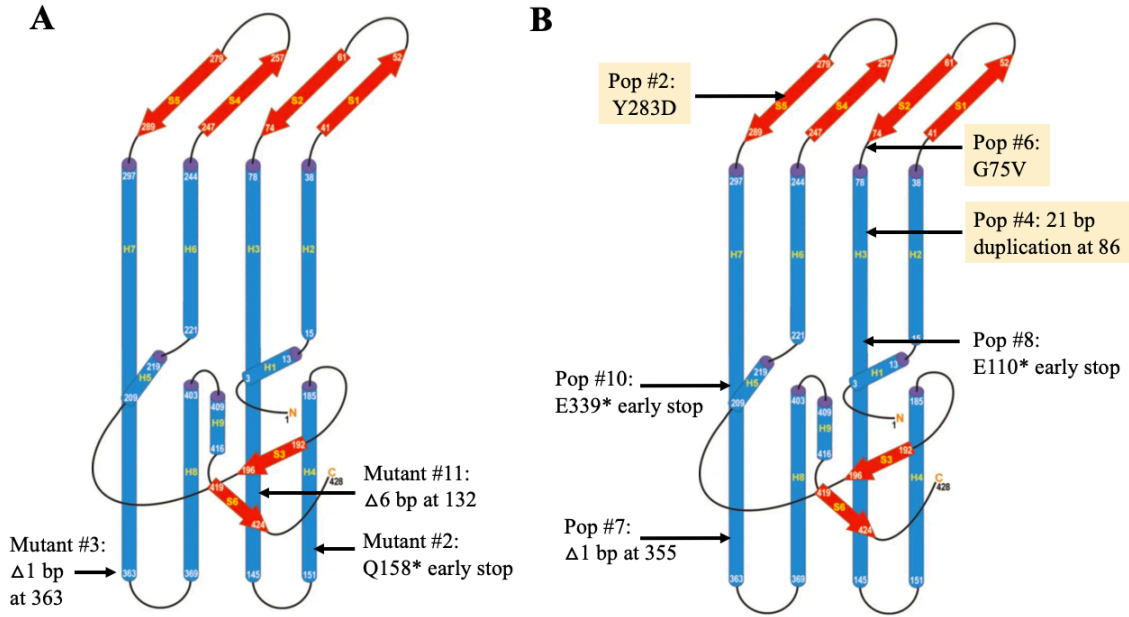

**Fig. S4.** Location of point mutations and small INDELS in the TolC amino acid sequence for strains from the fluctuation experiment (A) and evolution experiment (B). Mutations highlighted in yellow confer the ancestral tetracycline resistance phenotype (main text Table 3). Insertion-sequence (IS) mediated mutations are not shown. Modified by permission from ref. 1, Springer Nature: [Nature](#), copyright (2000).

**Table S1.** Bacteria and phage used in the study.

| Strain                             | Description                                                                             | Relevant Characteristics      |
|------------------------------------|-----------------------------------------------------------------------------------------|-------------------------------|
| <b>Bacteria</b>                    |                                                                                         |                               |
| <i>E. coli</i>                     |                                                                                         |                               |
| BW25113                            | <i>E. coli</i> K12, parental strain of Keio collection (19)                             |                               |
| JW5503-1                           | <i>tolC</i> knockout in Keio collection (19)                                            | $\Delta tolC732::kan$         |
| JW2341-1                           | <i>fadL</i> knockout in Keio collection (19)                                            | $\Delta fadL752::kan$         |
| JW0401-1                           | <i>tsx</i> knockout in Keio collection (19)                                             | $\Delta tsx773::kan$          |
| JW3996-1                           | <i>lamB</i> knockout in Keio collection (19)                                            | $\Delta lamB732::kan$         |
| JW0940-6                           | <i>ompA</i> knockout in Keio collection (19)                                            | $\Delta ompA772::kan$         |
| JW2203-1                           | <i>ompC</i> knockout in Keio collection (19)                                            | $\Delta ompC768::kan$         |
| JW0912-1                           | <i>ompF</i> knockout in Keio collection (19)                                            | $\Delta ompF746::kan$         |
| JW0146-2                           | <i>fhuA</i> knockout in Keio collection (19)                                            | $\Delta fhuA766::kan$         |
| JW5195-1                           | <i>tonB</i> knockout in Keio collection (19)                                            | $\Delta tonB760::kan$         |
| JW3603-2                           | <i>rfaB</i> knockout in Keio collection (19)                                            | $\Delta rfaB739::kan$         |
| JW3596-1                           | <i>rfaC</i> knockout in Keio collection (19)                                            | $\Delta rfaC733::kan$         |
| JW3594-1                           | <i>rfaD</i> knockout in Keio collection (19)                                            | $\Delta rfaD731::kan$         |
| JW3024-1                           | <i>rfaE</i> knockout in Keio collection (19)                                            | $\Delta rfaE745::kan$         |
| JW3595-2                           | <i>rfaF</i> knockout in Keio collection (19)                                            | $\Delta rfaF732::kan$         |
| JW3606-1                           | <i>rfaG</i> knockout in Keio collection (19)                                            | $\Delta rfaG742::kan$         |
| JW3818-1                           | <i>rfaH</i> knockout in Keio collection (19)                                            | $\Delta rfaH783::kan$         |
| JW3602-1                           | <i>rfaI</i> knockout in Keio collection (19)                                            | $\Delta rfaI738::kan$         |
| JW3601-3                           | <i>rfaJ</i> knockout in Keio collection (19)                                            | $\Delta rfaJ737::kan$         |
| JW3597-1                           | <i>rfaL</i> knockout in Keio collection (19)                                            | $\Delta rfaL734::kan$         |
| JW3605-1                           | <i>rfaP</i> knockout in Keio collection (19)                                            | $\Delta rfaP741::kan$         |
| JW3607-2                           | <i>rfaQ</i> knockout in Keio collection (19)                                            | $\Delta rfaQ743::kan$         |
| JW3604-2                           | <i>rfaS</i> knockout in Keio collection (19)                                            | $\Delta rfaS740::kan$         |
| JW3600-1                           | <i>rfaY</i> knockout in Keio collection (19)                                            | $\Delta rfaY736::kan$         |
| JW3599-1                           | <i>rfaZ</i> knockout in Keio collection (19)                                            | $\Delta rfaZ735::kan$         |
| AG1                                | ASKA strain collection (33)                                                             | Contains pCA24N ("pEmpty")    |
| JW5503-AM                          | ASKA strain collection (33)                                                             | Contains pCA24N:: <i>tolC</i> |
| JW3596-AM                          | ASKA strain collection (33)                                                             | Contains pCA24N:: <i>rfaC</i> |
| ASKA(-) <i>rfaC</i>                | ASKA strain collection (33)                                                             | Contains pCA24N:: <i>rfaD</i> |
| JW3024-AM                          | ASKA strain collection (33)                                                             | Contains pCA24N:: <i>rfaE</i> |
| JW3605-AM                          | ASKA strain collection (33)                                                             | Contains pCA24N:: <i>rfaP</i> |
| REL606                             | <i>E. coli</i> B                                                                        |                               |
| CFT073                             | Uropathogenic <i>E. coli</i> (UPEC), ATCC # 700928                                      |                               |
| 3FM4i                              | Commensal strain (20), gift from the lab of Heather Allen-Vercoe (University of Guelph) |                               |
| <i>Shigella flexneri</i> PE577     | Gift from the lab of Kristin Parent (Michigan State University)                         |                               |
| <i>Salmonella enterica</i> MZ1597  |                                                                                         |                               |
| <i>Citrobacter freundii</i> AB273  | AB273, sea turtle isolate                                                               |                               |
| <i>Pseudomonas aeruginosa</i> PA01 |                                                                                         |                               |
| <b>Phage</b>                       |                                                                                         |                               |
| Phage U136B                        | Environmental isolate from swine farm                                                   |                               |

**Table S2.** Sensitivities to colistin in *rfa* gene knockouts. Data summarized from Table S18 of the genome-wide screen reported by Liu et al. 2010 *Antimicrob Agents Chemother* 54(4):1393-1403.

| Keio Knockout | Colistin MIC (ng/ml) |
|---------------|----------------------|
| Wild type     | 250                  |
| <i>rfaD</i>   | 100                  |
| <i>rfaG</i>   | 100                  |
| <i>rfaC</i>   | 150                  |
| <i>rfaE</i>   | 160                  |
| <i>rfaH</i>   | 175                  |

**Table S3.** Phage extinction dynamics during the evolution experiment. Timing of phage extinctions was based on plating filtered phage samples as spot tests, top agar overlays, or both. At Day 10, Population +9 was not detectable in the serial dilution spot test, but it did have plaques appear in the filtered phage sample.

| Day | Populations Extinct |
|-----|---------------------|
| 1-5 | None                |
| 6   | +1, +3, +5          |
| 7   | +1, +3, +5, +7, +10 |
| 8   | +1, +3, +5, +7, +10 |
| 9   | +1, +3, +5, +7, +10 |
| 10  | +1, +3, +5, +7, +10 |



**Table S4.** Genes in the 48-gene deletion. The only gene readily related to LPS synthesis is *gmhA* (row 6), a phosphoheptose isomerase involved in core polysaccharide synthesis.

| <b>Gene</b>  | <b>Protein Annotation (Uniprot)</b>                                                |
|--------------|------------------------------------------------------------------------------------|
| <i>yafU</i>  | Putative inner membrane protein                                                    |
| <i>yafF</i>  | Putative uncharacterized protein                                                   |
| <i>yafV</i>  | Omega-amidase                                                                      |
| <i>ivy</i>   | Inhibitor of vertebrate lysozyme                                                   |
| <i>fadE</i>  | Acyl-coenzyme A dehydrogenase                                                      |
| <i>gmhA</i>  | Phosphoheptose isomerase                                                           |
| <i>yafJ</i>  | Putative glutamine amidotransferase                                                |
| <i>yafK</i>  | Putative L, D-transpeptidase                                                       |
| <i>yafQ</i>  | mRNA interferase toxin                                                             |
| <i>dinJ</i>  | Antitoxin                                                                          |
| <i>yafL</i>  | Probable endopeptidase                                                             |
| <i>rayT</i>  | REP-associated tyrosine transposase                                                |
| <i>lfhA</i>  | Putative truncated flagellar export/assembly protein                               |
| <i>lafU</i>  | Putative truncated flagellar export/assembly protein                               |
| <i>dinB</i>  | DNA polymerase IV                                                                  |
| <i>yafN</i>  | Antitoxin                                                                          |
| <i>yafO</i>  | mRNA interferase toxin                                                             |
| <i>yafP</i>  | Uncharacterized N-acetyltransferase                                                |
| <i>ykfJ</i>  | Putative uncharacterized protein                                                   |
| <i>prfH</i>  | Putative peptide chain release factor homolog                                      |
| <i>pepD</i>  | Cytosol non-specific dipeptidase                                                   |
| <i>gpt</i>   | Xanthine phosphoribosyltransferase                                                 |
| <i>frsA</i>  | Esterase                                                                           |
| <i>crl</i>   | Sigma factor-binding protein                                                       |
| <i>phoE</i>  | Outer membrane porin                                                               |
| <i>proB</i>  | Glutamate 5-kinase                                                                 |
| <i>proA</i>  | Gamma-glutamyl phosphate reductase                                                 |
| <i>thrW</i>  | Unknown                                                                            |
| <i>ykfN</i>  | Unknown                                                                            |
| <i>ykfI</i>  | Toxin                                                                              |
| <i>yafW</i>  | Antitoxin                                                                          |
| <i>ykfH</i>  | Uncharacterized protein                                                            |
| <i>ykfG</i>  | Unknown                                                                            |
| <i>yafX</i>  | Uncharacterized                                                                    |
| <i>ykfF</i>  | Unknown                                                                            |
| <i>ykfB</i>  | L-Ala-D/L-Glu epimerase (in <i>Bacillus subtilis</i> )                             |
| <i>yafY</i>  | Lipoprotein                                                                        |
| <i>ykfL</i>  | Uncharacterized                                                                    |
| <i>ykfK</i>  | Unknown                                                                            |
| <i>yafZ</i>  | Unknown                                                                            |
| <i>ykfA</i>  | Uncharacterized                                                                    |
| <i>perR</i>  | HTH-type transcriptional regulator                                                 |
| <i>insN</i>  | Putative transposase for insertion sequence element IS911A                         |
| <i>insII</i> | Transposase for insertion sequence element IS30A                                   |
| <i>insN</i>  | Transposase for insertion sequence element IS911 (in <i>Shigella dysenteriae</i> ) |
| <i>eyeA</i>  | Unknown                                                                            |
| <i>ykfC</i>  | Unknown                                                                            |
| <i>insHI</i> | Transposase for insertion sequence element IS5A                                    |

**Table S5. Mutations in experimentally evolved Tet<sup>R</sup> isolates.**

| Isolate ID | Population | <i>tolC</i> mutation <sup>a</sup>                            | LPS-related mutation <sup>b</sup>                  | Other genes with mutations <sup>a</sup>                                                 |
|------------|------------|--------------------------------------------------------------|----------------------------------------------------|-----------------------------------------------------------------------------------------|
| AB297      | +1         | Δ21 bp, coding (239-259/1482 nt)                             |                                                    |                                                                                         |
| AB299      | +2         | Δ6 bp, coding (220-225/1482 nt)                              |                                                    |                                                                                         |
| AB301      | +3         |                                                              | <i>rfaP</i> IS5 (+) +4 bp, coding (359-362/798 nt) |                                                                                         |
| AB303      | +4         | (ACGGCATCAACTCTAAC GCGA) <sub>1→2</sub> coding (259/1482 nt) |                                                    | <i>gatR</i> <sup>c</sup> insE1 insertion pseudogene (173/475 nt)                        |
| AB305      | +5         | G302D (G <u>G</u> C→G <u>A</u> C)                            |                                                    |                                                                                         |
| AB307      | +6         | Δ15 bp coding (896-910/1482 nt)                              |                                                    |                                                                                         |
| AB309      | +7         |                                                              |                                                    | Isolate did not align to reference, may be contaminant. Excluded from analysis.         |
| AB311      | +8         | G302D (G <u>G</u> C→G <u>A</u> C)                            |                                                    |                                                                                         |
| AB313      | +9         | Δ9 bp coding (262-270/1482 nt)                               |                                                    |                                                                                         |
| AB315      | +10        |                                                              | <i>rfaP</i> D187V (G <u>A</u> T→G <u>I</u> T)      |                                                                                         |
| AB298      | -1         |                                                              |                                                    | <i>argd</i> <sup>d</sup> Δ134 bp at 2,811,717                                           |
| AB300      | -2         |                                                              |                                                    | <i>moaB</i> <sup>e</sup> Δ1 bp, coding (77/513 nt)                                      |
| AB302      | -3         |                                                              |                                                    | none                                                                                    |
| AB304      | -4         |                                                              |                                                    | <i>yaiX</i> <sup>f</sup> IS2 insertion (2/416 nt)                                       |
| AB306      | -5         |                                                              |                                                    | none                                                                                    |
| AB308      | -6         |                                                              |                                                    | <i>metE</i> <sup>g</sup> L19M (C <u>T</u> G→ <u>A</u> TG)                               |
| AB310      | -7         |                                                              |                                                    | none                                                                                    |
| AB312      | -8         |                                                              |                                                    | none                                                                                    |
| AB314      | -9         |                                                              |                                                    | <i>lplT</i> <sup>h</sup> (AAACATCATCACCCGGCCTT TGGC) <sub>1→</sub> coding (229/1194 nt) |
| AB316      | -10        |                                                              |                                                    | none                                                                                    |

<sup>a</sup>A “Δ” indicates deletion of indicated base pairs or gene. Values in parentheses indicate either single substitutions, or the location of a stop codon, INDEL, or IS-element insertion within coding sequences. Underlined bases indicate single substitutions; “nt” indicates nucleotide.

<sup>b</sup>All *rfa* gene names are synonymous with the corresponding *waa* gene names used in the BW25113 annotation. We report mutations in the *rfa* form for readability (e.g., *waaP* is equivalent to *rfaP*).

<sup>c</sup>*gatR*: pseudogene, repressor for *gat* operon, interrupted by IS3, split galactitol utilization operon repressor, fragment 2, split galactitol utilization operon repressor, interrupted

<sup>d</sup>*argV*: one of seven arginine tRNAs

<sup>e</sup>*moaB*: inactive molybdopterin adenyltransferase

<sup>f</sup>*yaiX*: pseudogene, interrupted by IS2A, acetyltransferase homolog, nonfunctional, interrupted by IS2, putative transferase

<sup>g</sup>*metE*: 5-methyltetrahydropteroyltriglutamate- homocysteine S-methyltransferase

<sup>h</sup>*lplT*: lysophospholipid transporter

**Table S6. Statistical analysis for phage-mediated trade-offs between colistin resistance and tetracycline resistance.** The trade-off is only observed among fluctuation assay mutants (“Fluctuation” model) and not after 10 days of evolution with phage (“Evolution + Phage” model) or in the control populations (“Evolution – Phage” model).

| <b>Model</b>      | <b>B</b> | <b>R2</b> | <b>p-value</b> | <b>F</b>                 |
|-------------------|----------|-----------|----------------|--------------------------|
| Fluctuation       | -0.020   | 0.77      | < 0.00001      | F <sub>1,18</sub> = 58.8 |
| Evolution + Phage | 0.013    | 0.13      | 0.31           | F <sub>1,8</sub> = 1.2   |
| Evolution – Phage | 0        | NA        | NA             | NA                       |

### Supplementary Datasets

**Dataset S1 (separate file).** EOP data on OMP knockouts, corresponding to Fig. 1A.

**Dataset S2 (separate file).** TolC complementation data, corresponding to Fig. 1B.

**Dataset S3 (separate file).** Bacterial growth curve data, corresponding to Fig. 1C.

**Dataset S4 (separate file).** Phage single-step growth curve data, corresponding to Fig. 1D.

**Dataset S5 (separate file).** EOP data on *rfa* gene knockouts, corresponding to Fig. 2A.

**Dataset S6 (separate file).** *Rfa* gene complementation data, corresponding to Fig. 2B.

**Dataset S7 (separate file).** Evolution experiment data, corresponding to Fig. 4.

### References

1. Koronakis V., Sharff A., Koronakis E., Luisi B., & Hughes C (2000) Crystal structure of the bacterial membrane protein TolC central to multidrug efflux and protein export. *Nature* 405:914-919.
