# Supplementary material for: Pleiotropy complicates a trade-off between phage resistance and antibiotic resistance
Source: Proc Natl Acad Sci U S A. 2020 May 18;117(21):11207–16. doi: 10.1073/pnas.1919888117 (PMC7260982; doi:10.1073/pnas.1919888117)
Supplement: Supplementary File [file pnas.1919888117.sd01.xlsx]

## Sheet: Sheet1
phage_stock	assay_date	bacteria	ml_spotted	n_plaques	dilution	pfu_per_ml	TR_n_plaques	TR_dilution	TR_pfu_per_ml	avg_pfu/ml	avg_eop
U136B_1	Oct_18	KJC9	0.002	1	1e-08	50000000000	2	1e-08	100000000000	75000000000	1
U136B_2	Oct_18	KJC9	0.002	1	1e-08	50000000000	5	1e-07	25000000000	37500000000	1
U136B_3	Oct_18	KJC9	0.002	4	1e-07	20000000000	1	1e-08	50000000000	35000000000	1
U136B_1	Oct_18	tolC	0.002	0	1e-08
U136B_2	Oct_18	tolC	0.002	0	1e-08
U136B_3	Oct_18	tolC	0.002	0	1e-08
U136B_1	Oct_18	ompR	0.002	3	1e-07	15000000000	1	1e-07	5000000000	10000000000	0.13
U136B_2	Oct_18	ompR	0.002	3	1e-07	15000000000	1	1e-07	5000000000	10000000000	0.27
U136B_3	Oct_18	ompR	0.002	3	1e-07	15000000000	1	1e-08	50000000000	32500000000	0.93
U136B_1	Oct_18	fadL	0.002	5	1e-07	25000000000	3	1e-08	150000000000	87500000000	1.2
U136B_2	Oct_18	fadL	0.002	3	1e-07	15000000000	1	1e-08	50000000000	32500000000	0.87
U136B_3	Oct_18	fadL	0.002	5	1e-07	25000000000	1	1e-08	50000000000	37500000000	1.1
U136B_1	Oct_18	ompF	0.002	6	1e-07	30000000000	1	1e-07	5000000000	17500000000	0.23
U136B_2	Oct_18	ompF	0.002	2	1e-07	10000000000	7	1e-06	3500000000	6750000000	0.18
U136B_3	Oct_18	ompF	0.002	4	1e-07	20000000000	1	1e-08	50000000000	35000000000	1
U136B_1	Oct_18	ompC	0.002	5	1e-07	25000000000	1	1e-08	50000000000	37500000000	0.5
U136B_2	Oct_18	ompC	0.002	2	1e-07	10000000000	1	1e-08	50000000000	30000000000	0.8
U136B_3	Oct_18	ompC	0.002	6	1e-07	30000000000	3	1e-08	150000000000	90000000000	2.6
U136B_1	Oct_18	tsx	0.002	1	1e-08	50000000000	1	1e-08	50000000000	50000000000	0.67
U136B_2	Oct_18	tsx	0.002	2	1e-07	10000000000	4	1e-07	20000000000	15000000000	0.4
U136B_3	Oct_18	tsx	0.002	4	1e-07	20000000000	1	1e-08	50000000000	35000000000	1
U136B_1	Oct_18	tonB	0.002	3	1e-07	15000000000	1	1e-07	5000000000	10000000000	0.13
U136B_2	Oct_18	tonB	0.002	4	1e-06	2000000000	1	1e-07	5000000000	3500000000	0.093
U136B_3	Oct_18	tonB	0.002	2	1e-07	10000000000	2	1e-07	10000000000	10000000000	0.29
U136B_1	Oct_18	ompA	0.002	4	1e-07	20000000000	2	1e-07	10000000000	15000000000	0.2
U136B_2	Oct_18	ompA	0.002	1	1e-08	50000000000	2	1e-08	100000000000	75000000000	2
U136B_3	Oct_18	ompA	0.002	1	1e-08	50000000000	5	1e-07	25000000000	37500000000	1.1
U136B_1	Oct_18	fhuA	0.002	4	1e-07	20000000000	3	1e-08	150000000000	85000000000	1.1
U136B_2	Oct_18	fhuA	0.002	5	1e-07	25000000000	1	1e-08	50000000000	37500000000	1
U136B_3	Oct_18	fhuA	0.002	1	1e-08	50000000000	5	1e-07	25000000000	37500000000	1.1
U136B_1	Oct_18	lamB	0.002	3	1e-08	150000000000	2	1e-07	10000000000	80000000000	1.1
U136B_2	Oct_18	lamB	0.002	3	1e-07	15000000000	2	1e-08	100000000000	57500000000	1.5
U136B_3	Oct_18	lamB	0.002	3	1e-07	15000000000	1	1e-08	50000000000	32500000000	0.93
