# Supplementary material for: Pleiotropy complicates a trade-off between phage resistance and antibiotic resistance
Source: Proc Natl Acad Sci U S A. 2020 May 18;117(21):11207–16. doi: 10.1073/pnas.1919888117 (PMC7260982; doi:10.1073/pnas.1919888117)
Supplement: Supplementary File [file pnas.1919888117.sd02.xlsx]

## Sheet: Sheet1
phage_stock	bacteria	ml_spotted	n_plaques	dilution	pfu/ml	log(pfu/ml)
1	BW25113	0.002	2	1e-05	1e+08	8
2	BW25113	0.002	2	0.0001	10000000	7
3	BW25113	0.002	3	0.0001	15000000	7.17609
4	BW25113	0.002	20	0.0001	100000000	8
1	tolC KO	0.002	0	0.1
2	tolC KO	0.002	0	0.1
3	tolC KO	0.002	0	0.1
4	tolC KO	0.002	0	0.1
1	tolC + pTolC	0.002	2	1e-05	1e+08	8
2	tolC + pTolC	0.002	4	1e-05	2e+08	8.30103
3	tolC + pTolC	0.002	1	1e-05	5e+07	7.69897
4	tolC + pTolC	0.002	2	1e-06	1000000000	9
1	tolC + pEmpty	0.002	0	0.1
2	tolC + pEmpty	0.002	0	0.1
3	tolC + pEmpty	0.002	0	0.1
4	tolC + pEmpty	0.002	0	0.1
