# Supplementary material for: Pleiotropy complicates a trade-off between phage resistance and antibiotic resistance
Source: Proc Natl Acad Sci U S A. 2020 May 18;117(21):11207–16. doi: 10.1073/pnas.1919888117 (PMC7260982; doi:10.1073/pnas.1919888117)
Supplement: Supplementary File [file pnas.1919888117.sd03.xlsx]

## Sheet: Sheet1
Temp	time(s)	time(h)	Location in well plate	U136B MOI 1 on tolC KO Rep 1	U136B MOI 1 on tolC KO Rep 2	U136B MOI 1 on tolC KO Rep 3	U136B MOI 1 on tolC KO mean	U136B MOI 1 on BW25113 Rep 1	U136B MOI 1 on BW25113 Rep 2	U136B MOI 1 on BW25113 Rep 3	U136B MOI 1 on BW25113 mean	U136B MOI 0 on BW25113 Rep 1	U136B MOI 0 on BW25113 Rep 2	U136B MOI 0 on BW25113 Rep 3	U136B MOI 0 on BW25113 Rep 4	U136B MOI 0 on BW25113 Rep 5	U136B MOI 0 on BW25113 Rep 6	U136B MOI 0 on BW25113 mean	U136B MOI 0 on tolC KO Rep 1	U136B MOI 0 on tolC KO Rep 2	U136B MOI 0 on tolC KO Rep 3	U136B MOI 0 on tolC KO Rep 4	U136B MOI 0 on tolC KO Rep 5	U136B MOI 0 on tolC KO Rep 6	U136B MOI 0 on tolC KO mean
36.9 °C	0s	0		0.1013	0.103	0.1005	0.1016	0.0992	0.0987	0.0989	0.0989333	0.0973	0.0978	0.0972	0.0987	0.0981	0.0988	0.0979833	0.0997	0.1006	0.1018	0.0998	0.0989	0.0995	0.10005
37.1 °C	140s	0.0388889		0.1018	0.103	0.101	0.101933	0.0999	0.0997	0.0994	0.0996667	0.0977	0.0988	0.0979	0.1	0.0991	0.0999	0.0989	0.0997	0.1007	0.1026	0.1001	0.0988	0.0996	0.10025
37.1 °C	281s	0.0780556		0.1034	0.1042	0.1017	0.1031	0.101	0.1009	0.1002	0.1007	0.0993	0.0999	0.0985	0.101	0.1002	0.1005	0.0999	0.1003	0.1013	0.1031	0.101	0.0997	0.1005	0.100983
37.1 °C	421s	0.116944		0.1048	0.1041	0.1026	0.103833	0.1022	0.1019	0.1012	0.101767	0.1002	0.1009	0.0992	0.1018	0.1013	0.1016	0.100833	0.1008	0.1021	0.1034	0.1015	0.1006	0.1011	0.101583
37.1 °C	561s	0.155833		0.1054	0.1055	0.1036	0.104833	0.1031	0.1028	0.1019	0.1026	0.1014	0.1026	0.0999	0.1031	0.1026	0.1026	0.102033	0.101	0.103	0.1047	0.1025	0.1017	0.1016	0.102417
37.0 °C	702s	0.195		0.1072	0.106	0.1047	0.105967	0.1041	0.104	0.1027	0.1036	0.1032	0.1039	0.1012	0.1043	0.1039	0.1037	0.103367	0.1018	0.104	0.1057	0.1039	0.1022	0.1027	0.103383
37.1 °C	842s	0.233889		0.1088	0.1078	0.1056	0.1074	0.1055	0.1057	0.1042	0.105133	0.105	0.106	0.1019	0.1056	0.1057	0.1049	0.10485	0.1027	0.1048	0.1067	0.1046	0.1031	0.1033	0.1042
37.1 °C	983s	0.273056		0.1101	0.1085	0.1065	0.108367	0.1073	0.1076	0.1058	0.1069	0.107	0.1081	0.1028	0.1075	0.1075	0.1067	0.1066	0.1033	0.1058	0.1074	0.1055	0.104	0.1047	0.105117
37.1 °C	1123s	0.311944		0.1125	0.1096	0.1082	0.1101	0.1089	0.1092	0.1071	0.1084	0.1091	0.1108	0.1042	0.1096	0.1095	0.1084	0.1086	0.1042	0.1068	0.1093	0.1068	0.1049	0.1055	0.10625
37.0 °C	1263s	0.350833		0.1144	0.1109	0.1094	0.111567	0.1107	0.1116	0.109	0.110433	0.1117	0.114	0.1055	0.1116	0.1122	0.1102	0.110867	0.1052	0.1084	0.1104	0.1083	0.1063	0.1069	0.107583
37.1 °C	1404s	0.39		0.1162	0.1121	0.1107	0.113	0.113	0.1136	0.1108	0.112467	0.1141	0.1177	0.1068	0.1138	0.1146	0.1125	0.11325	0.1068	0.11	0.1115	0.1098	0.1076	0.1088	0.109083
37.1 °C	1544s	0.428889		0.1189	0.1139	0.1128	0.1152	0.1158	0.1162	0.1131	0.115033	0.1164	0.1215	0.1086	0.1169	0.1178	0.1147	0.115983	0.108	0.1114	0.1144	0.1113	0.1087	0.1102	0.110667
37.1 °C	1684s	0.467778		0.1216	0.1155	0.1145	0.1172	0.1178	0.1189	0.1154	0.117367	0.1199	0.126	0.1101	0.1194	0.1206	0.1171	0.11885	0.1094	0.1133	0.1154	0.1131	0.1105	0.1117	0.112233
37.0 °C	1825s	0.506944		0.1251	0.1175	0.1168	0.1198	0.1203	0.1213	0.1178	0.1198	0.1224	0.1305	0.1124	0.1224	0.124	0.1197	0.1219	0.1116	0.1154	0.1174	0.1152	0.1123	0.1138	0.114283
37.1 °C	1965s	0.545833		0.1289	0.1199	0.1195	0.122767	0.1231	0.1244	0.1203	0.1226	0.1256	0.1352	0.1143	0.1251	0.128	0.1221	0.12505	0.1133	0.1172	0.1206	0.1173	0.1144	0.1158	0.116433
37.0 °C	2106s	0.585		0.1328	0.1227	0.1217	0.125733	0.1262	0.1278	0.1236	0.125867	0.1291	0.141	0.1172	0.1288	0.1317	0.126	0.128967	0.1156	0.1199	0.1224	0.1204	0.1169	0.1181	0.118883
37.0 °C	2246s	0.623889		0.137	0.1244	0.1244	0.1286	0.1287	0.1312	0.1265	0.1288	0.1316	0.1463	0.1193	0.132	0.1361	0.129	0.132383	0.118	0.1221	0.1248	0.1225	0.1186	0.1204	0.121067
37.1 °C	2386s	0.662778		0.1417	0.1269	0.1274	0.132	0.1317	0.1338	0.1293	0.1316	0.1352	0.1526	0.1219	0.1354	0.1395	0.1323	0.13615	0.1202	0.1252	0.1296	0.1254	0.1212	0.1235	0.124183
37.1 °C	2527s	0.701944		0.1461	0.1296	0.1302	0.1353	0.1353	0.1375	0.1327	0.135167	0.1387	0.1589	0.125	0.1408	0.1449	0.1367	0.140833	0.1227	0.1277	0.1313	0.1285	0.124	0.1261	0.126717
37.0 °C	2667s	0.740833		0.1509	0.1326	0.1344	0.1393	0.1382	0.1406	0.1362	0.138333	0.1427	0.1651	0.1279	0.1442	0.1492	0.1406	0.14495	0.1258	0.1308	0.1344	0.132	0.1261	0.1295	0.129767
37.1 °C	2807s	0.779722		0.1557	0.1365	0.1377	0.1433	0.1418	0.1444	0.1398	0.142	0.1459	0.172	0.1314	0.1486	0.1547	0.1451	0.149617	0.1286	0.1339	0.1395	0.135	0.1298	0.1325	0.133217
37.1 °C	2948s	0.818889		0.1622	0.1394	0.1417	0.147767	0.1457	0.148	0.1435	0.145733	0.1508	0.1795	0.1348	0.1544	0.1602	0.1503	0.155	0.1319	0.138	0.1415	0.1394	0.1331	0.1361	0.136667
37.0 °C	3088s	0.857778		0.1688	0.1427	0.1461	0.152533	0.1486	0.1518	0.1474	0.149267	0.155	0.1864	0.1392	0.1588	0.1672	0.1556	0.160367	0.1355	0.1415	0.1464	0.1432	0.1367	0.1398	0.140517
37.2 °C	3229s	0.896944		0.1754	0.1468	0.151	0.157733	0.1515	0.1533	0.1511	0.151967	0.16	0.1945	0.1429	0.165	0.1722	0.1612	0.165967	0.1389	0.1455	0.1517	0.1471	0.1402	0.1438	0.144533
37.1 °C	3369s	0.935833		0.183	0.1516	0.1561	0.163567	0.1528	0.1557	0.1546	0.154367	0.1652	0.2024	0.1479	0.1708	0.18	0.1672	0.17225	0.1427	0.1496	0.1557	0.1532	0.1443	0.148	0.148917
37.0 °C	3509s	0.974722		0.191	0.1562	0.1613	0.1695	0.1536	0.1565	0.1571	0.155733	0.1712	0.2102	0.1523	0.1784	0.1866	0.1734	0.178683	0.1477	0.1553	0.1594	0.1579	0.149	0.1533	0.153767
37.1 °C	3650s	1.01389		0.1991	0.1609	0.1673	0.175767	0.1529	0.156	0.1591	0.156	0.1768	0.2201	0.1576	0.1855	0.1947	0.1809	0.185933	0.1516	0.1604	0.1623	0.1631	0.1538	0.1582	0.158233
37.1 °C	3790s	1.05278		0.2081	0.1654	0.1723	0.181933	0.153	0.1549	0.1604	0.1561	0.1837	0.2286	0.1634	0.1933	0.2029	0.189	0.193483	0.1564	0.1649	0.1711	0.1694	0.1587	0.1635	0.164
37.1 °C	3930s	1.09167		0.217	0.171	0.1786	0.188867	0.1511	0.154	0.1611	0.1554	0.1912	0.2381	0.169	0.2009	0.2126	0.197	0.201467	0.1609	0.1699	0.1763	0.1752	0.1633	0.1687	0.16905
37.2 °C	4071s	1.13083		0.2259	0.1748	0.1849	0.1952	0.1489	0.152	0.1601	0.153667	0.1989	0.248	0.1748	0.2087	0.2215	0.206	0.20965	0.1658	0.1756	0.1774	0.181	0.169	0.1745	0.173883
37.0 °C	4211s	1.16972		0.2362	0.1803	0.1915	0.202667	0.144	0.1483	0.1575	0.149933	0.2071	0.2586	0.1815	0.2183	0.2315	0.2159	0.218817	0.171	0.1805	0.187	0.1878	0.1736	0.1797	0.179933
37.2 °C	4352s	1.20889		0.244	0.1855	0.1984	0.2093	0.1383	0.1429	0.1519	0.144367	0.2131	0.2683	0.189	0.2288	0.2425	0.2261	0.227967	0.1756	0.1854	0.1965	0.194	0.1788	0.1842	0.18575
37.1 °C	4492s	1.24778		0.2554	0.1929	0.2067	0.218333	0.1313	0.1348	0.1448	0.136967	0.2158	0.2758	0.1943	0.2353	0.2517	0.2358	0.234783	0.1823	0.1925	0.2028	0.2005	0.1845	0.1916	0.192367
37.1 °C	4632s	1.28667		0.2629	0.1969	0.2094	0.223067	0.1238	0.1269	0.1366	0.1291	0.2211	0.281	0.1961	0.2404	0.2566	0.2415	0.23945	0.1856	0.1951	0.2062	0.2088	0.1914	0.1969	0.197333
37.2 °C	4773s	1.32583		0.2693	0.1983	0.2123	0.226633	0.116	0.1193	0.1275	0.120933	0.2274	0.2884	0.2005	0.2472	0.2648	0.2469	0.245867	0.186	0.1967	0.2092	0.2136	0.1929	0.1975	0.199317
37.1 °C	4913s	1.36472		0.2758	0.2011	0.2168	0.231233	0.1077	0.1112	0.1182	0.112367	0.2343	0.2994	0.2071	0.2571	0.2749	0.2555	0.254717	0.1901	0.1999	0.2133	0.2165	0.194	0.2012	0.2025
37.1 °C	5053s	1.40361		0.2845	0.2061	0.2228	0.2378	0.0991	0.1023	0.1089	0.103433	0.2432	0.311	0.2133	0.2676	0.2854	0.2658	0.264383	0.1953	0.2056	0.2188	0.2207	0.1979	0.2051	0.207233
37.2 °C	5194s	1.44278		0.2957	0.2119	0.2315	0.246367	0.0929	0.0948	0.1	0.0959	0.2519	0.3213	0.2217	0.2788	0.299	0.2797	0.2754	0.2009	0.2114	0.2267	0.2283	0.2038	0.212	0.21385
37.2 °C	5334s	1.48167		0.3059	0.2193	0.2404	0.2552	0.0894	0.0901	0.093	0.0908333	0.2618	0.3315	0.2313	0.2905	0.3117	0.2903	0.286183	0.2082	0.2179	0.2331	0.2371	0.2109	0.219	0.221033
37.2 °C	5475s	1.52083		0.3154	0.2246	0.2465	0.262167	0.088	0.0879	0.0892	0.0883667	0.2692	0.3427	0.2387	0.3013	0.3229	0.3028	0.296267	0.2153	0.2248	0.2412	0.2449	0.217	0.226	0.2282
37.1 °C	5615s	1.55972		0.3232	0.2309	0.2528	0.268967	0.0873	0.087	0.088	0.0874333	0.2757	0.3511	0.2454	0.3109	0.3334	0.3133	0.304967	0.2218	0.23	0.2467	0.2505	0.224	0.2322	0.2342
37.1 °C	5755s	1.59861		0.3325	0.2358	0.2589	0.275733	0.0868	0.0866	0.0877	0.0870333	0.2845	0.3612	0.2526	0.3205	0.3446	0.3221	0.31425	0.2261	0.2344	0.2507	0.2583	0.2303	0.2382	0.239667
37.2 °C	5896s	1.63778		0.3408	0.2399	0.2655	0.282067	0.0868	0.0865	0.0875	0.0869333	0.292	0.3749	0.2589	0.3308	0.3567	0.3336	0.324483	0.2314	0.2405	0.255	0.264	0.2346	0.2429	0.244733
37.2 °C	6036s	1.67667		0.3481	0.2465	0.2707	0.288433	0.0866	0.0863	0.0873	0.0867333	0.3016	0.3849	0.2671	0.3418	0.3668	0.3455	0.334617	0.239	0.2462	0.2614	0.2692	0.2404	0.2485	0.250783
37.3 °C	6176s	1.71556		0.3537	0.2521	0.2792	0.295	0.0865	0.0862	0.0873	0.0866667	0.3097	0.3968	0.2753	0.3528	0.3782	0.3581	0.34515	0.2478	0.2525	0.2677	0.2755	0.2462	0.2544	0.25735
37.2 °C	6317s	1.75472		0.3626	0.2611	0.2869	0.303533	0.0865	0.0861	0.0872	0.0866	0.3178	0.4085	0.2837	0.3643	0.393	0.3707	0.356333	0.2563	0.2609	0.2758	0.2831	0.2551	0.2642	0.2659
37.3 °C	6457s	1.79361		0.3733	0.2692	0.295	0.3125	0.0865	0.0861	0.0872	0.0866	0.3258	0.4202	0.2909	0.375	0.4046	0.3828	0.36655	0.2654	0.2665	0.2827	0.2914	0.2627	0.2712	0.273317
37.1 °C	6597s	1.8325		0.3825	0.2767	0.3039	0.321033	0.0864	0.0861	0.0871	0.0865333	0.3331	0.4294	0.2985	0.3858	0.418	0.395	0.376633	0.2733	0.2735	0.2942	0.2997	0.2699	0.2777	0.281383
37.2 °C	6738s	1.87167		0.3928	0.2841	0.3115	0.329467	0.0863	0.0859	0.0868	0.0863333	0.34	0.4408	0.3053	0.396	0.4298	0.4043	0.386033	0.281	0.2792	0.3014	0.3104	0.2793	0.2854	0.28945
37.1 °C	6878s	1.91056		0.3999	0.2907	0.3231	0.3379	0.0862	0.0859	0.0869	0.0863333	0.3461	0.4534	0.3131	0.4063	0.4425	0.4169	0.396383	0.2888	0.287	0.3126	0.3175	0.2858	0.2947	0.297733
37.3 °C	7019s	1.94972		0.4075	0.297	0.3314	0.3453	0.0861	0.0859	0.0868	0.0862667	0.3549	0.4663	0.3203	0.4144	0.4543	0.4262	0.406067	0.2958	0.2942	0.3241	0.3227	0.2902	0.3	0.3045
37.2 °C	7159s	1.98861		0.4187	0.3035	0.3432	0.355133	0.0862	0.0859	0.0868	0.0863	0.3605	0.4794	0.3274	0.425	0.4632	0.4371	0.415433	0.3033	0.3008	0.3332	0.3304	0.2969	0.3092	0.3123
37.1 °C	7299s	2.0275		0.4267	0.3094	0.3487	0.3616	0.0861	0.0856	0.0869	0.0862	0.3674	0.4926	0.3352	0.4346	0.4765	0.4461	0.4254	0.3104	0.3101	0.3449	0.3357	0.3054	0.3191	0.320933
37.2 °C	7440s	2.06667		0.4332	0.3119	0.3427	0.3626	0.086	0.0857	0.0867	0.0861333	0.3747	0.5073	0.3431	0.4449	0.4876	0.4574	0.435833	0.3147	0.3183	0.3575	0.3439	0.3121	0.327	0.328917
37.3 °C	7580s	2.10556		0.4384	0.3168	0.345	0.366733	0.086	0.0856	0.0866	0.0860667	0.382	0.5202	0.3515	0.4548	0.4998	0.4677	0.446	0.3246	0.3231	0.3836	0.352	0.3205	0.3278	0.3386
37.0 °C	7720s	2.14444		0.448	0.3303	0.3521	0.3768	0.0859	0.0855	0.0865	0.0859667	0.3915	0.535	0.3593	0.4663	0.5114	0.4789	0.457067	0.3394	0.3259	0.4048	0.358	0.3262	0.3308	0.347517
37.1 °C	7861s	2.18361		0.4567	0.3458	0.3627	0.3884	0.0859	0.0854	0.0864	0.0859	0.4001	0.5488	0.3701	0.4777	0.5239	0.4883	0.46815	0.3467	0.3395	0.4239	0.3663	0.3385	0.3421	0.3595
37.2 °C	8001s	2.2225		0.4725	0.3529	0.3698	0.3984	0.0858	0.0856	0.0865	0.0859667	0.4099	0.5633	0.3811	0.4913	0.5375	0.4999	0.4805	0.3549	0.3469	0.4391	0.3779	0.3495	0.3526	0.37015
37.2 °C	8142s	2.26167		0.4865	0.3593	0.3793	0.408367	0.0859	0.0854	0.0865	0.0859333	0.4168	0.5765	0.3908	0.4984	0.5455	0.5121	0.490017	0.363	0.3546	0.458	0.3931	0.3582	0.3588	0.38095
37.4 °C	8282s	2.30056		0.4987	0.3658	0.3824	0.415633	0.0859	0.0855	0.0866	0.086	0.4228	0.5867	0.3996	0.5072	0.5563	0.5205	0.49885	0.3707	0.3601	0.4852	0.3982	0.3654	0.364	0.3906
37.3 °C	8422s	2.33944		0.5108	0.3656	0.3907	0.422367	0.0858	0.0855	0.0864	0.0859	0.4325	0.6002	0.4091	0.5187	0.5692	0.53	0.50995	0.3757	0.3692	0.5059	0.4098	0.3676	0.3739	0.40035
37.3 °C	8563s	2.37861		0.5167	0.3717	0.3952	0.427867	0.0857	0.0854	0.0865	0.0858667	0.4414	0.6092	0.4175	0.5267	0.577	0.5385	0.518383	0.383	0.3743	0.5222	0.4158	0.3701	0.3799	0.40755
37.2 °C	8703s	2.4175		0.5256	0.3783	0.4028	0.435567	0.0858	0.0855	0.0864	0.0859	0.4504	0.6213	0.428	0.536	0.5877	0.5484	0.528633	0.3912	0.3818	0.5422	0.4179	0.38	0.3862	0.41655
37.3 °C	8843s	2.45639		0.5354	0.386	0.4108	0.444067	0.0858	0.0855	0.0864	0.0859	0.457	0.63	0.4366	0.5447	0.597	0.5566	0.536983	0.3962	0.3861	0.5627	0.4293	0.3813	0.3924	0.424667
37.2 °C	8984s	2.49556		0.5466	0.3891	0.4165	0.450733	0.0857	0.0853	0.0863	0.0857667	0.4651	0.6377	0.4453	0.5532	0.6035	0.5667	0.54525	0.3996	0.3882	0.5794	0.4311	0.3855	0.3988	0.430433
37.2 °C	9124s	2.53444		0.5539	0.3925	0.4231	0.4565	0.0857	0.0854	0.0864	0.0858333	0.4758	0.6459	0.4541	0.5629	0.6161	0.5752	0.555	0.402	0.3928	0.5944	0.4386	0.3903	0.4029	0.436833
37.2 °C	9265s	2.57361		0.5671	0.3995	0.4295	0.465367	0.0857	0.0853	0.0863	0.0857667	0.4839	0.6527	0.4626	0.5702	0.6227	0.5816	0.562283	0.4104	0.3961	0.6088	0.4426	0.3964	0.4094	0.44395
37.3 °C	9405s	2.6125		0.573	0.4077	0.441	0.4739	0.0857	0.0854	0.0864	0.0858333	0.4961	0.6599	0.4737	0.5805	0.6318	0.5894	0.5719	0.4168	0.3997	0.6204	0.4507	0.4041	0.4173	0.4515
37.2 °C	9545s	2.65139		0.5835	0.4185	0.4589	0.486967	0.0856	0.0853	0.0864	0.0857667	0.5065	0.6681	0.4854	0.5915	0.6421	0.5986	0.582033	0.4283	0.4093	0.6372	0.4599	0.4108	0.428	0.46225
37.2 °C	9686s	2.69056		0.5933	0.4275	0.4713	0.497367	0.0857	0.0853	0.0864	0.0858	0.5118	0.6778	0.4949	0.5991	0.6521	0.6099	0.590933	0.4343	0.4212	0.6546	0.4694	0.4187	0.4425	0.47345
37.4 °C	9826s	2.72944		0.5966	0.4334	0.4864	0.505467	0.0857	0.0852	0.0864	0.0857667	0.5154	0.6837	0.5	0.6055	0.6604	0.6166	0.596933	0.4434	0.4314	0.6623	0.475	0.4284	0.4653	0.4843
37.3 °C	9966s	2.76833		0.6115	0.4428	0.5064	0.520233	0.0857	0.0853	0.0864	0.0858	0.5209	0.6895	0.5048	0.6119	0.6658	0.6236	0.60275	0.4495	0.4364	0.677	0.4834	0.4444	0.496	0.497783
37.3 °C	10107s	2.8075		0.6309	0.4487	0.5259	0.535167	0.0857	0.0854	0.0864	0.0858333	0.5232	0.6948	0.5084	0.6141	0.6708	0.6248	0.606017	0.4562	0.4471	0.6883	0.4924	0.4579	0.5411	0.513833
37.3 °C	10247s	2.84639		0.6454	0.4517	0.5509	0.549333	0.0857	0.0852	0.0863	0.0857333	0.5296	0.6992	0.5143	0.6205	0.6774	0.6313	0.61205	0.4669	0.4501	0.7079	0.502	0.473	0.5733	0.528867
37.3 °C	10388s	2.88556		0.6591	0.4543	0.5809	0.564767	0.0857	0.0852	0.0863	0.0857333	0.5352	0.7035	0.5193	0.6256	0.6789	0.6361	0.616433	0.4696	0.4531	0.7257	0.5115	0.4929	0.5997	0.542083
37.2 °C	10528s	2.92444		0.6693	0.4549	0.614	0.5794	0.0857	0.0855	0.0864	0.0858667	0.5395	0.7087	0.5237	0.6321	0.6863	0.6415	0.621967	0.4735	0.4546	0.738	0.5181	0.5119	0.6168	0.55215
37.3 °C	10668s	2.96333		0.6774	0.4597	0.6506	0.5959	0.0857	0.0853	0.0863	0.0857667	0.5456	0.7128	0.5273	0.6371	0.6917	0.644	0.626417	0.4759	0.4583	0.7535	0.5284	0.5448	0.6425	0.567233
37.3 °C	10809s	3.0025		0.6838	0.4622	0.6756	0.6072	0.0858	0.0853	0.0863	0.0858	0.5501	0.7185	0.5332	0.6422	0.6964	0.6507	0.63185	0.4768	0.4616	0.769	0.5364	0.5765	0.6597	0.58
37.2 °C	10949s	3.04139		0.6911	0.463	0.6992	0.617767	0.0857	0.0852	0.0864	0.0857667	0.5531	0.7238	0.5371	0.6483	0.7011	0.6542	0.636267	0.4782	0.4631	0.7823	0.5429	0.5969	0.6736	0.5895
37.2 °C	11089s	3.08028		0.6998	0.4663	0.7149	0.627	0.0858	0.0852	0.0863	0.0857667	0.5584	0.7266	0.5389	0.6535	0.7074	0.6563	0.640183	0.4819	0.4648	0.7934	0.5531	0.6202	0.688	0.600233
37.3 °C	11230s	3.11944		0.7069	0.4693	0.7249	0.6337	0.0858	0.0852	0.0864	0.0858	0.5626	0.7313	0.5437	0.6564	0.7123	0.6621	0.644733	0.4813	0.4675	0.8055	0.558	0.6272	0.697	0.606083
37.3 °C	11370s	3.15833		0.7119	0.4694	0.7279	0.6364	0.0858	0.0853	0.0864	0.0858333	0.5653	0.7353	0.5466	0.662	0.7177	0.6662	0.64885	0.4839	0.4666	0.8153	0.5599	0.6335	0.7012	0.610067
37.2 °C	11511s	3.1975		0.712	0.4735	0.7374	0.640967	0.0857	0.0853	0.0864	0.0858	0.5687	0.7366	0.5503	0.6657	0.708	0.6699	0.649867	0.4864	0.4692	0.821	0.5681	0.6366	0.706	0.61455
37.3 °C	11654s	3.23722		0.7152	0.4714	0.7425	0.643033	0.0859	0.0853	0.0865	0.0859	0.5706	0.7404	0.555	0.6676	0.7231	0.6747	0.655233	0.4883	0.4678	0.8299	0.5709	0.6434	0.7062	0.61775
37.3 °C	11794s	3.27611		0.7168	0.4728	0.7471	0.645567	0.0858	0.0853	0.0865	0.0858667	0.5727	0.7453	0.5574	0.6719	0.7282	0.6764	0.65865	0.4878	0.4684	0.8337	0.579	0.6406	0.7072	0.61945
37.3 °C	11934s	3.315		0.7181	0.4767	0.7494	0.648067	0.0858	0.0855	0.0864	0.0859	0.5759	0.7443	0.5611	0.6742	0.7327	0.6823	0.66175	0.4909	0.47	0.8373	0.5815	0.6321	0.7059	0.619617
37.3 °C	12075s	3.35417		0.7166	0.4785	0.7547	0.649933	0.0858	0.0856	0.0866	0.086	0.5806	0.7509	0.5652	0.6803	0.7366	0.684	0.666267	0.4937	0.4707	0.8394	0.5859	0.625	0.7009	0.619267
37.3 °C	12215s	3.39306		0.7106	0.4805	0.7565	0.6492	0.0859	0.0853	0.0863	0.0858333	0.5817	0.753	0.5682	0.6832	0.7429	0.6898	0.6698	0.4957	0.4724	0.8416	0.5897	0.6204	0.704	0.620633
37.3 °C	12356s	3.43222		0.7107	0.4809	0.7606	0.650733	0.0859	0.0855	0.0865	0.0859667	0.5878	0.7568	0.5715	0.6905	0.7457	0.6914	0.67395	0.4988	0.4752	0.8458	0.598	0.6235	0.7029	0.624033
37.3 °C	12496s	3.47111		0.7066	0.482	0.7638	0.6508	0.086	0.0854	0.0866	0.086	0.5886	0.7606	0.5758	0.6926	0.7498	0.6968	0.677367	0.5057	0.4727	0.8517	0.5984	0.6223	0.7016	0.6254
37.3 °C	12636s	3.51		0.7042	0.4841	0.7685	0.652267	0.086	0.0854	0.0865	0.0859667	0.5927	0.7626	0.5794	0.6986	0.7533	0.6986	0.680867	0.5104	0.4765	0.8543	0.6014	0.6205	0.708	0.628517
37.3 °C	12777s	3.54917		0.6986	0.4858	0.7731	0.6525	0.086	0.0854	0.0867	0.0860333	0.5946	0.7669	0.5831	0.7034	0.7605	0.7038	0.685383	0.5139	0.4753	0.857	0.6012	0.6158	0.7115	0.629117
37.2 °C	12917s	3.58806		0.6938	0.4858	0.7735	0.651033	0.0861	0.0858	0.0867	0.0862	0.5977	0.7716	0.5864	0.7045	0.7632	0.7071	0.688417	0.516	0.4716	0.8521	0.6038	0.618	0.7064	0.627983
37.2 °C	13057s	3.62694		0.6958	0.4859	0.7757	0.652467	0.086	0.0854	0.0866	0.086	0.6009	0.7736	0.5919	0.7125	0.7646	0.7108	0.692383	0.5167	0.4757	0.8579	0.601	0.6229	0.7084	0.630433
37.3 °C	13198s	3.66611		0.6959	0.4895	0.7824	0.655933	0.0861	0.0856	0.0867	0.0861333	0.6032	0.7783	0.5986	0.7167	0.771	0.7154	0.6972	0.5164	0.4767	0.8586	0.6063	0.6215	0.7157	0.632533
37.3 °C	13338s	3.705		0.6992	0.4932	0.7864	0.6596	0.0862	0.0855	0.0868	0.0861667	0.6042	0.783	0.6071	0.7175	0.7745	0.7212	0.70125	0.5185	0.4782	0.8645	0.6108	0.6213	0.7177	0.635167
37.2 °C	13479s	3.74417		0.7013	0.4935	0.7936	0.6628	0.0862	0.0856	0.0866	0.0861333	0.6076	0.7865	0.6118	0.7244	0.7804	0.7287	0.706567	0.5195	0.482	0.8677	0.6135	0.625	0.7241	0.638633
37.3 °C	13619s	3.78306		0.7045	0.4972	0.7917	0.664467	0.0861	0.0857	0.0866	0.0861333	0.613	0.7927	0.6171	0.7318	0.7857	0.731	0.711883	0.5222	0.486	0.8687	0.627	0.6327	0.7282	0.644133
37.3 °C	13759s	3.82194		0.7038	0.4979	0.7934	0.665033	0.0862	0.0855	0.0867	0.0861333	0.6172	0.7972	0.621	0.7365	0.7893	0.7366	0.7163	0.5218	0.4891	0.8705	0.6318	0.6319	0.7329	0.646333
37.3 °C	13900s	3.86111		0.708	0.4963	0.7961	0.6668	0.0862	0.0857	0.0868	0.0862333	0.6223	0.8029	0.6261	0.7415	0.7961	0.741	0.72165	0.5238	0.492	0.872	0.6407	0.6359	0.7364	0.650133
37.3 °C	14040s	3.9		0.715	0.4977	0.8003	0.671	0.0863	0.0859	0.0867	0.0863	0.6268	0.8058	0.6299	0.7462	0.7971	0.745	0.725133	0.5267	0.5019	0.8745	0.645	0.6403	0.7451	0.655583
37.3 °C	14180s	3.93889		0.7185	0.5003	0.8056	0.6748	0.0863	0.0859	0.0869	0.0863667	0.6317	0.8097	0.6324	0.7489	0.8012	0.7474	0.72855	0.5283	0.509	0.8736	0.654	0.6474	0.7518	0.660683
37.3 °C	14321s	3.97806		0.7249	0.5023	0.8077	0.6783	0.0863	0.0857	0.087	0.0863333	0.6367	0.8197	0.6363	0.7548	0.8053	0.7518	0.7341	0.5264	0.5141	0.8774	0.6682	0.6488	0.753	0.66465
37.3 °C	14461s	4.01694		0.732	0.5009	0.8092	0.6807	0.0864	0.0858	0.0865	0.0862333	0.6394	0.8229	0.6406	0.757	0.8069	0.7563	0.737183	0.5268	0.515	0.8801	0.6712	0.6573	0.7567	0.66785
37.3 °C	14601s	4.05583		0.7388	0.5015	0.8139	0.684733	0.0863	0.0856	0.0866	0.0861667	0.6421	0.8285	0.6441	0.7628	0.8098	0.7579	0.740867	0.5292	0.5177	0.8814	0.6805	0.6614	0.7619	0.672017
37.2 °C	14742s	4.095		0.7421	0.5017	0.8161	0.686633	0.0863	0.086	0.0868	0.0863667	0.6463	0.8319	0.6484	0.7681	0.8145	0.7606	0.744967	0.5329	0.5136	0.8815	0.6862	0.6639	0.7678	0.674317
37.2 °C	14882s	4.13389		0.7468	0.5012	0.8192	0.689067	0.0864	0.0858	0.0872	0.0864667	0.6483	0.8376	0.6517	0.7698	0.8174	0.7653	0.74835	0.5319	0.5187	0.8839	0.6916	0.6678	0.7681	0.677
37.3 °C	15023s	4.17306		0.7504	0.5016	0.8212	0.691067	0.0864	0.0858	0.087	0.0864	0.6518	0.8451	0.6548	0.7737	0.8216	0.7695	0.75275	0.5343	0.5207	0.8851	0.7054	0.6672	0.7729	0.680933
37.3 °C	15163s	4.21194		0.7544	0.5	0.8243	0.6929	0.0865	0.0859	0.0872	0.0865333	0.6555	0.8492	0.6586	0.7768	0.8257	0.7711	0.75615	0.534	0.5223	0.8862	0.7095	0.6716	0.7752	0.683133
37.3 °C	15303s	4.25083		0.7564	0.5049	0.8276	0.6963	0.0865	0.0861	0.0869	0.0865	0.6587	0.8563	0.6628	0.7823	0.8312	0.7762	0.76125	0.5366	0.5269	0.8878	0.7156	0.6757	0.7824	0.6875
37.3 °C	15444s	4.29		0.7592	0.5063	0.8291	0.6982	0.0866	0.0859	0.0871	0.0865333	0.6618	0.8615	0.6674	0.7846	0.8373	0.7818	0.765733	0.5377	0.5241	0.8894	0.7229	0.678	0.7857	0.689633
37.2 °C	15584s	4.32889		0.7597	0.5043	0.8304	0.698133	0.0865	0.0859	0.0872	0.0865333	0.6657	0.8704	0.6719	0.7891	0.8438	0.7847	0.770933	0.5373	0.5261	0.8908	0.7286	0.6825	0.787	0.69205
37.3 °C	15724s	4.36778		0.7618	0.5066	0.8343	0.7009	0.0865	0.0859	0.0871	0.0865	0.6689	0.877	0.6766	0.7927	0.8484	0.7888	0.7754	0.539	0.5278	0.8926	0.7334	0.6869	0.7937	0.695567
37.4 °C	15865s	4.40694		0.764	0.5081	0.8356	0.702567	0.0866	0.086	0.087	0.0865333	0.6738	0.8825	0.6799	0.7996	0.8535	0.7902	0.779917	0.5436	0.5312	0.8924	0.738	0.6908	0.7903	0.697717
37.3 °C	16005s	4.44583		0.7694	0.5074	0.8359	0.704233	0.0867	0.0859	0.087	0.0865333	0.678	0.8875	0.684	0.8031	0.8582	0.7937	0.784083	0.5418	0.5291	0.893	0.7433	0.6957	0.7948	0.699617
37.3 °C	16146s	4.485		0.7695	0.5055	0.8364	0.7038	0.0868	0.086	0.0871	0.0866333	0.6796	0.8939	0.6874	0.8032	0.8633	0.7977	0.787517	0.5438	0.5291	0.8962	0.7456	0.6937	0.799	0.701233
37.3 °C	16286s	4.52389		0.7723	0.5047	0.8398	0.7056	0.0868	0.086	0.0872	0.0866667	0.6841	0.8982	0.6903	0.8105	0.8644	0.8035	0.791833	0.5463	0.5269	0.8975	0.7508	0.6975	0.7999	0.70315
37.3 °C	16426s	4.56278		0.7719	0.5087	0.8448	0.708467	0.0869	0.086	0.0872	0.0867	0.6881	0.9082	0.6953	0.814	0.8729	0.8092	0.79795	0.5466	0.5375	0.8988	0.755	0.7009	0.8016	0.706733
37.2 °C	16567s	4.60194		0.775	0.5094	0.8462	0.7102	0.0869	0.086	0.087	0.0866333	0.6914	0.914	0.6989	0.8163	0.8803	0.8161	0.802833	0.5479	0.5363	0.9002	0.7612	0.7046	0.8062	0.7094
37.3 °C	16707s	4.64083		0.778	0.5104	0.8493	0.712567	0.087	0.0863	0.0873	0.0868667	0.6963	0.918	0.7018	0.822	0.8843	0.8185	0.806817	0.5507	0.5342	0.902	0.7657	0.7069	0.8079	0.711233
37.3 °C	16847s	4.67972		0.783	0.5053	0.8487	0.712333	0.087	0.0861	0.0873	0.0868	0.6995	0.9206	0.7047	0.8254	0.8849	0.8262	0.810217	0.5517	0.5335	0.9021	0.7671	0.708	0.809	0.7119
37.3 °C	16988s	4.71889		0.7877	0.5098	0.855	0.7175	0.0871	0.0863	0.0874	0.0869333	0.7008	0.9272	0.7079	0.8259	0.8911	0.8324	0.814217	0.555	0.5345	0.9042	0.7735	0.7063	0.8132	0.71445
37.3 °C	17128s	4.75778		0.7921	0.5096	0.8565	0.7194	0.087	0.0864	0.0872	0.0868667	0.7047	0.9328	0.7109	0.8297	0.8962	0.8377	0.818667	0.5543	0.5301	0.9055	0.7738	0.7067	0.8099	0.713383
37.3 °C	17269s	4.79694		0.7948	0.5101	0.86	0.721633	0.087	0.0864	0.0873	0.0869	0.709	0.9396	0.7146	0.8341	0.9005	0.8438	0.8236	0.5557	0.5345	0.9064	0.7776	0.7093	0.8146	0.71635
37.3 °C	17409s	4.83583		0.7969	0.5096	0.863	0.723167	0.0872	0.0863	0.0871	0.0868667	0.7121	0.9442	0.7187	0.8382	0.9046	0.8525	0.828383	0.5576	0.5388	0.9066	0.779	0.7127	0.8158	0.718417
37.3 °C	17549s	4.87472		0.8015	0.5101	0.8636	0.725067	0.0872	0.0864	0.0874	0.087	0.715	0.9493	0.7212	0.8407	0.9079	0.8537	0.8313	0.5571	0.5392	0.9068	0.7839	0.7119	0.8145	0.7189
37.3 °C	17690s	4.91389		0.8023	0.5176	0.8675	0.729133	0.0873	0.0865	0.0875	0.0871	0.7199	0.9545	0.7241	0.847	0.9117	0.8561	0.83555	0.562	0.5423	0.9085	0.7863	0.7165	0.8205	0.722683
37.3 °C	17830s	4.95278		0.8055	0.5145	0.8685	0.7295	0.0874	0.0864	0.0876	0.0871333	0.7229	0.9593	0.727	0.8502	0.9165	0.8643	0.840033	0.5606	0.5418	0.9103	0.7935	0.7219	0.8205	0.724767
37.3 °C	17970s	4.99167		0.8082	0.5167	0.8704	0.731767	0.0873	0.0865	0.0876	0.0871333	0.7261	0.964	0.7315	0.8518	0.9176	0.8693	0.843383	0.5609	0.542	0.911	0.7919	0.721	0.8252	0.725333
37.3 °C	18111s	5.03083		0.8101	0.514	0.8705	0.731533	0.0874	0.0865	0.0874	0.0871	0.7293	0.9713	0.7346	0.8571	0.9223	0.8719	0.84775	0.5629	0.545	0.9116	0.7973	0.7233	0.8263	0.727733
37.3 °C	18251s	5.06972		0.812	0.5189	0.8697	0.733533	0.0876	0.0867	0.0875	0.0872667	0.7319	0.9753	0.7377	0.8579	0.9258	0.8755	0.850683	0.5643	0.5441	0.9108	0.7975	0.7249	0.8223	0.727317
37.3 °C	18392s	5.10889		0.8146	0.5188	0.8714	0.734933	0.0875	0.0866	0.0877	0.0872667	0.7358	0.9802	0.7404	0.8623	0.9275	0.8786	0.854133	0.5651	0.5471	0.9121	0.7971	0.7279	0.8264	0.729283
37.3 °C	18532s	5.14778		0.8172	0.5199	0.8736	0.7369	0.0876	0.0867	0.0878	0.0873667	0.7407	0.985	0.7444	0.8678	0.9298	0.8832	0.858483	0.5659	0.546	0.9129	0.8044	0.7302	0.8266	0.731
37.3 °C	18672s	5.18667		0.8189	0.5196	0.8731	0.7372	0.0876	0.0868	0.0876	0.0873333	0.7461	0.9903	0.7474	0.872	0.9328	0.8862	0.862467	0.565	0.5471	0.9124	0.8045	0.7335	0.8273	0.731633
37.3 °C	18813s	5.22583		0.8222	0.5199	0.8754	0.739167	0.0878	0.087	0.0871	0.0873	0.7475	0.9978	0.7502	0.8717	0.9382	0.8891	0.86575	0.5689	0.5485	0.9131	0.8027	0.7329	0.829	0.732517
37.3 °C	18953s	5.26472		0.8257	0.5213	0.8741	0.740367	0.0879	0.0869	0.0878	0.0875333	0.7511	0.9982	0.7534	0.878	0.9361	0.8928	0.868267	0.5687	0.552	0.9124	0.809	0.738	0.8281	0.7347
37.3 °C	19093s	5.30361		0.8247	0.5223	0.8767	0.741233	0.088	0.087	0.0878	0.0876	0.7531	1.0049	0.7578	0.8787	0.9409	0.8965	0.871983	0.5742	0.5523	0.9155	0.8073	0.7398	0.8313	0.736733
37.3 °C	19234s	5.34278		0.8255	0.5231	0.8759	0.7415	0.0881	0.0872	0.0874	0.0875667	0.7571	1.0094	0.7604	0.8828	0.9431	0.898	0.875133	0.5794	0.5497	0.9149	0.8121	0.7391	0.8303	0.737583
37.3 °C	19374s	5.38167		0.826	0.5276	0.8775	0.7437	0.0882	0.0872	0.0877	0.0877	0.7601	1.0141	0.7628	0.884	0.9443	0.8999	0.877533	0.583	0.5525	0.9161	0.8127	0.7438	0.8311	0.739867
37.3 °C	19514s	5.42056		0.8252	0.5259	0.8794	0.7435	0.0882	0.0873	0.0879	0.0878	0.7645	1.0145	0.7659	0.8897	0.9457	0.904	0.880717	0.5852	0.5537	0.9163	0.8106	0.7411	0.8351	0.740333
37.3 °C	19655s	5.45972		0.828	0.5258	0.8789	0.744233	0.0884	0.0874	0.0882	0.088	0.7678	1.0203	0.7688	0.8927	0.9498	0.9058	0.8842	0.587	0.5546	0.9159	0.8138	0.7457	0.8314	0.7414
37.4 °C	19795s	5.49861		0.8294	0.5266	0.8806	0.745533	0.0886	0.0874	0.088	0.088	0.7712	1.0255	0.7731	0.8953	0.9519	0.9088	0.887633	0.5879	0.5549	0.9168	0.817	0.747	0.832	0.7426
37.3 °C	19936s	5.53778		0.8323	0.5292	0.8829	0.748133	0.0886	0.0875	0.0877	0.0879333	0.7714	1.0289	0.7759	0.8944	0.9542	0.9128	0.8896	0.59	0.5546	0.9178	0.8179	0.7463	0.8336	0.743367
37.4 °C	20076s	5.57667		0.8344	0.5279	0.8843	0.748867	0.089	0.0877	0.0882	0.0883	0.7731	1.0303	0.7804	0.8968	0.9554	0.9157	0.89195	0.5914	0.5531	0.9198	0.8177	0.7439	0.8358	0.743617
37.3 °C	20216s	5.61556		0.8363	0.5291	0.8841	0.749833	0.0891	0.0877	0.0881	0.0883	0.7773	1.0346	0.7826	0.9004	0.9599	0.9162	0.895167	0.5945	0.5555	0.9194	0.8174	0.7497	0.8353	0.7453
37.3 °C	20357s	5.65472		0.8357	0.5298	0.8865	0.750667	0.0891	0.088	0.0885	0.0885333	0.7804	1.0383	0.7853	0.9048	0.9635	0.9197	0.898667	0.5954	0.5562	0.9215	0.8198	0.7519	0.8362	0.746833
37.4 °C	20497s	5.69361		0.8369	0.5297	0.8902	0.752267	0.0893	0.0879	0.0882	0.0884667	0.7844	1.0398	0.7884	0.9086	0.9621	0.9217	0.900833	0.5969	0.5571	0.9233	0.8222	0.7518	0.8363	0.747933
37.3 °C	20637s	5.7325		0.8379	0.5308	0.8898	0.752833	0.0894	0.0883	0.0882	0.0886333	0.7844	1.0442	0.7933	0.9073	0.9671	0.9274	0.90395	0.5976	0.5555	0.9234	0.8236	0.7511	0.8362	0.7479
37.3 °C	20778s	5.77167		0.8407	0.5314	0.8924	0.754833	0.0898	0.0884	0.0884	0.0888667	0.7887	1.0493	0.7975	0.9109	0.9689	0.9295	0.907467	0.5991	0.5555	0.9247	0.8246	0.7511	0.8389	0.748983
37.3 °C	20918s	5.81056		0.8407	0.5357	0.8926	0.756333	0.09	0.0885	0.0885	0.089	0.7914	1.0521	0.8021	0.9144	0.9701	0.9313	0.910233	0.6016	0.5575	0.9258	0.8274	0.7561	0.8383	0.751117
37.3 °C	21059s	5.84972		0.8421	0.5355	0.8938	0.757133	0.0905	0.0892	0.0885	0.0894	0.7945	1.0549	0.8056	0.9181	0.9728	0.9339	0.9133	0.6025	0.5561	0.9254	0.828	0.7581	0.8383	0.7514
37.3 °C	21199s	5.88861		0.84	0.5411	0.896	0.759033	0.0906	0.089	0.0884	0.0893333	0.7964	1.057	0.8104	0.9179	0.9735	0.9394	0.915767	0.6044	0.5564	0.9266	0.8282	0.7576	0.842	0.752533
37.3 °C	21339s	5.9275		0.8409	0.5431	0.897	0.760333	0.0908	0.0893	0.0889	0.0896667	0.7981	1.0598	0.8127	0.9209	0.9784	0.9386	0.918083	0.6058	0.5567	0.9264	0.8303	0.7599	0.8407	0.7533
37.3 °C	21480s	5.96667		0.8414	0.545	0.8979	0.761433	0.0914	0.0897	0.089	0.0900333	0.8024	1.0644	0.8168	0.9248	0.9825	0.9425	0.922233	0.607	0.5598	0.927	0.8363	0.7603	0.8434	0.755633
37.3 °C	21620s	6.00556		0.8428	0.5467	0.8992	0.7629	0.0916	0.0897	0.089	0.0901	0.8042	1.0657	0.8206	0.9273	0.9822	0.9461	0.92435	0.6086	0.5588	0.9283	0.8409	0.7629	0.8461	0.7576
37.3 °C	21760s	6.04444		0.8424	0.5482	0.9002	0.7636	0.0919	0.0903	0.0895	0.0905667	0.8094	1.0697	0.825	0.9318	0.9864	0.9527	0.929167	0.61	0.5618	0.9279	0.8423	0.7639	0.8518	0.759617
37.2 °C	21901s	6.08361		0.8425	0.5499	0.9019	0.764767	0.0922	0.0903	0.0894	0.0906333	0.8124	1.0739	0.83	0.9345	0.9914	0.958	0.933367	0.611	0.5659	0.9302	0.8452	0.7689	0.8559	0.76285
37.3 °C	22041s	6.1225		0.8435	0.5517	0.9039	0.766367	0.0927	0.0908	0.0897	0.0910667	0.8152	1.0754	0.8325	0.9364	0.9927	0.9592	0.935233	0.6125	0.5657	0.9314	0.8467	0.7689	0.8572	0.763733
37.3 °C	22182s	6.16167		0.8448	0.5524	0.9044	0.7672	0.0931	0.091	0.0895	0.0912	0.8182	1.0774	0.8362	0.9398	0.9949	0.9617	0.938033	0.6155	0.57	0.9308	0.8493	0.7677	0.8592	0.765417
37.2 °C	22322s	6.20056		0.8441	0.5524	0.906	0.7675	0.0936	0.0914	0.09	0.0916667	0.8204	1.0783	0.8406	0.9462	0.9988	0.9682	0.942083	0.616	0.5703	0.9312	0.8509	0.7707	0.8602	0.76655
37.3 °C	22462s	6.23944		0.8453	0.5518	0.9083	0.768467	0.0939	0.0919	0.09	0.0919333	0.824	1.0801	0.843	0.9489	1.0017	0.9721	0.944967	0.6166	0.57	0.9325	0.8509	0.7736	0.8636	0.767867
37.3 °C	22603s	6.27861		0.8474	0.5542	0.9074	0.769667	0.0946	0.0923	0.0905	0.0924667	0.8289	1.0839	0.8474	0.9538	1.005	0.9757	0.949117	0.6188	0.5735	0.932	0.8547	0.7762	0.8638	0.769833
37.3 °C	22743s	6.3175		0.8497	0.5552	0.9108	0.7719	0.0951	0.0929	0.0906	0.0928667	0.8308	1.0857	0.8501	0.956	1.0097	0.9816	0.952317	0.6185	0.5752	0.9337	0.8557	0.7794	0.8652	0.771283
37.3 °C	22883s	6.35639		0.8511	0.5591	0.9129	0.774367	0.0958	0.0934	0.0909	0.0933667	0.8354	1.09	0.8552	0.9603	1.0137	0.9862	0.9568	0.6211	0.5771	0.9358	0.8587	0.7829	0.8674	0.773833
37.3 °C	23024s	6.39556		0.8536	0.5612	0.9145	0.776433	0.0967	0.0941	0.0911	0.0939667	0.8394	1.0936	0.858	0.9635	1.0184	0.9884	0.960217	0.6224	0.5827	0.9358	0.86	0.7851	0.8683	0.775717
37.3 °C	23164s	6.43444		0.8546	0.5642	0.9152	0.778	0.0974	0.0946	0.0916	0.0945333	0.8454	1.0952	0.8625	0.9693	1.0229	0.9929	0.9647	0.6227	0.5851	0.9366	0.8631	0.7905	0.8692	0.777867
37.3 °C	23305s	6.47361		0.8574	0.5613	0.9159	0.7782	0.098	0.0951	0.092	0.0950333	0.8484	1.0991	0.8649	0.974	1.0268	0.9971	0.968383	0.6251	0.5859	0.9382	0.8652	0.7923	0.8711	0.779633
37.3 °C	23445s	6.5125		0.8584	0.5651	0.9177	0.7804	0.0988	0.0957	0.0924	0.0956333	0.8509	1.1012	0.8693	0.9774	1.0298	1.0031	0.97195	0.6253	0.5848	0.9397	0.8673	0.7928	0.8717	0.780267
37.3 °C	23585s	6.55139		0.8597	0.5669	0.9185	0.7817	0.0997	0.0965	0.0926	0.0962667	0.8538	1.102	0.8722	0.9815	1.0304	1.0065	0.9744	0.6272	0.5887	0.9414	0.8694	0.7963	0.874	0.782833
37.3 °C	23726s	6.59056		0.8617	0.5659	0.921	0.782867	0.1007	0.0974	0.0927	0.0969333	0.8552	1.1054	0.8748	0.983	1.0375	1.0102	0.977683	0.6279	0.5875	0.942	0.8713	0.7953	0.8752	0.7832
37.3 °C	23866s	6.62944		0.8626	0.5676	0.922	0.784067	0.1015	0.098	0.0936	0.0977	0.86	1.1077	0.8791	0.9867	1.0419	1.0169	0.98205	0.629	0.5892	0.9413	0.8722	0.7957	0.8771	0.784083
37.3 °C	24006s	6.66833		0.8644	0.5691	0.9261	0.786533	0.1027	0.099	0.0937	0.0984667	0.8638	1.111	0.8838	0.9924	1.0467	1.0222	0.98665	0.6301	0.5914	0.9419	0.8745	0.7989	0.8828	0.7866
37.5 °C	24147s	6.7075		0.8669	0.5699	0.9262	0.787667	0.1036	0.1002	0.0945	0.0994333	0.8657	1.112	0.8844	0.9948	1.0507	1.0251	0.988783	0.6315	0.5922	0.9421	0.8745	0.7982	0.8819	0.786733
37.3 °C	24287s	6.74639		0.8682	0.5744	0.9266	0.789733	0.1048	0.101	0.0952	0.100333	0.8706	1.1124	0.89	0.9987	1.0544	1.0307	0.9928	0.6332	0.5962	0.9431	0.8803	0.8047	0.8832	0.790117
37.2 °C	24428s	6.78556		0.871	0.5738	0.9266	0.790467	0.1063	0.1018	0.0954	0.101167	0.8737	1.1153	0.8938	1.0046	1.0611	1.0374	0.99765	0.6337	0.5988	0.9433	0.8816	0.8054	0.8827	0.790917
37.3 °C	24568s	6.82444		0.8718	0.5741	0.9282	0.791367	0.1075	0.1032	0.0961	0.102267	0.8757	1.1143	0.8964	1.0048	1.0628	1.0408	0.999133	0.6347	0.5992	0.9449	0.882	0.8069	0.8856	0.792217
37.3 °C	24708s	6.86333		0.8738	0.5763	0.9295	0.7932	0.109	0.1044	0.0967	0.103367	0.881	1.1171	0.9004	1.0112	1.0677	1.0468	1.00403	0.6368	0.6029	0.9435	0.884	0.8096	0.8864	0.793867
37.3 °C	24849s	6.9025		0.8766	0.5789	0.9317	0.795733	0.1103	0.1058	0.0976	0.104567	0.8846	1.1197	0.9018	1.015	1.0732	1.0491	1.00723	0.6379	0.6061	0.9451	0.8844	0.8134	0.89	0.79615
37.3 °C	24989s	6.94139		0.8781	0.5808	0.9324	0.7971	0.1119	0.1073	0.0983	0.105833	0.8845	1.1209	0.9037	1.0164	1.0782	1.0543	1.00967	0.6393	0.6053	0.9462	0.8893	0.8146	0.8917	0.797733
37.3 °C	25129s	6.98028		0.8796	0.5825	0.9323	0.798133	0.1141	0.1086	0.0996	0.107433	0.8901	1.118	0.9074	1.0236	1.077	1.0579	1.01233	0.6412	0.6092	0.9453	0.8889	0.8172	0.8911	0.798817
37.5 °C	25270s	7.01944		0.8813	0.5839	0.9358	0.800333	0.1156	0.1102	0.1001	0.108633	0.8904	1.1243	0.9108	1.024	1.086	1.0639	1.01657	0.6426	0.6125	0.947	0.8907	0.8179	0.8952	0.800983
37.3 °C	25410s	7.05833		0.8835	0.5853	0.9357	0.8015	0.1177	0.1116	0.1008	0.110033	0.8953	1.1256	0.9129	1.0314	1.0904	1.0678	1.02057	0.6441	0.613	0.9485	0.8932	0.8205	0.8962	0.802583
37.3 °C	25550s	7.09722		0.8846	0.5841	0.9369	0.801867	0.12	0.1137	0.102	0.1119	0.8966	1.1278	0.9167	1.0321	1.0941	1.0707	1.023	0.6469	0.6154	0.9494	0.8948	0.8218	0.8982	0.804417
37.3 °C	25691s	7.13639		0.8866	0.5865	0.9385	0.803867	0.1217	0.1151	0.1026	0.113133	0.8996	1.1281	0.9159	1.0383	1.0964	1.0734	1.02528	0.6483	0.6183	0.9498	0.8975	0.8239	0.8987	0.806083
37.2 °C	25831s	7.17528		0.8887	0.5892	0.94	0.805967	0.1241	0.1172	0.104	0.1151	0.9003	1.1287	0.9192	1.0394	1.0999	1.078	1.02758	0.6492	0.6171	0.951	0.8991	0.8255	0.9004	0.80705
37.3 °C	25972s	7.21444		0.8897	0.5929	0.9433	0.808633	0.127	0.1195	0.1053	0.117267	0.9036	1.1302	0.924	1.0465	1.1037	1.0844	1.03207	0.6526	0.6202	0.9533	0.9008	0.8277	0.9045	0.80985
37.3 °C	26112s	7.25333		0.8906	0.5943	0.9428	0.809233	0.1293	0.1217	0.1064	0.119133	0.9036	1.1336	0.9264	1.0459	1.1086	1.0859	1.034	0.6556	0.623	0.9534	0.9004	0.8308	0.9047	0.811317
37.2 °C	26252s	7.29222		0.8939	0.5969	0.943	0.811267	0.1325	0.124	0.1074	0.1213	0.9067	1.1328	0.9286	1.0507	1.1133	1.0901	1.03703	0.6561	0.6262	0.9541	0.9038	0.8308	0.9057	0.812783
37.3 °C	26393s	7.33139		0.8944	0.5952	0.945	0.811533	0.1347	0.1262	0.1088	0.123233	0.9094	1.1361	0.9303	1.0519	1.1167	1.0945	1.03982	0.6582	0.6261	0.9556	0.9048	0.8321	0.9056	0.813733
37.3 °C	26533s	7.37028		0.8975	0.5982	0.9461	0.813933	0.1387	0.1291	0.1106	0.126133	0.9137	1.1328	0.9316	1.0588	1.1171	1.0963	1.04172	0.6608	0.6292	0.9565	0.907	0.8345	0.9074	0.8159
37.3 °C	26673s	7.40917		0.8969	0.6004	0.9497	0.815667	0.1417	0.1319	0.1122	0.1286	0.9121	1.1361	0.9371	1.0575	1.1217	1.104	1.04475	0.6618	0.6271	0.9596	0.9063	0.8342	0.9108	0.816633
37.3 °C	26814s	7.44833		0.8993	0.6024	0.9501	0.817267	0.1449	0.1354	0.1137	0.131333	0.916	1.1387	0.9397	1.0629	1.1292	1.1058	1.04872	0.6646	0.6312	0.9594	0.908	0.8371	0.911	0.81855
37.3 °C	26954s	7.48722		0.8999	0.6038	0.9512	0.8183	0.1486	0.1381	0.1156	0.1341	0.9209	1.1399	0.9416	1.0683	1.1294	1.1085	1.05143	0.6669	0.6356	0.96	0.9086	0.8408	0.9107	0.820433
37.3 °C	27095s	7.52639		0.9022	0.6086	0.9533	0.821367	0.1519	0.1418	0.1172	0.136967	0.9246	1.1448	0.9462	1.0713	1.1386	1.1149	1.05673	0.6683	0.6361	0.9607	0.9131	0.8418	0.912	0.822
37.5 °C	27235s	7.56528		0.9029	0.6091	0.9555	0.8225	0.1561	0.1455	0.1187	0.1401	0.9247	1.1458	0.948	1.0717	1.1409	1.1177	1.05813	0.6703	0.6377	0.9627	0.9111	0.8428	0.9136	0.823033
37.3 °C	27375s	7.60417		0.9054	0.6143	0.956	0.825233	0.1607	0.1482	0.1209	0.143267	0.9293	1.1409	0.9491	1.0782	1.1387	1.1197	1.05932	0.6715	0.6406	0.9633	0.915	0.8437	0.9138	0.82465
37.3 °C	27516s	7.64333		0.9068	0.6137	0.9589	0.826467	0.1657	0.152	0.1236	0.1471	0.9303	1.1482	0.9525	1.0793	1.148	1.1256	1.06398	0.674	0.6411	0.9666	0.9157	0.8451	0.9176	0.826683
37.3 °C	27656s	7.68222		0.9076	0.6152	0.9591	0.8273	0.1704	0.1563	0.1264	0.151033	0.9324	1.1455	0.957	1.0821	1.1463	1.1321	1.0659	0.6762	0.6417	0.9664	0.9171	0.8445	0.9161	0.827
37.3 °C	27796s	7.72111		0.9094	0.6189	0.9628	0.830367	0.1759	0.1608	0.1284	0.155033	0.9331	1.1507	0.9584	1.084	1.153	1.1328	1.06867	0.678	0.643	0.9693	0.9187	0.8463	0.92	0.829217
37.2 °C	27937s	7.76028		0.9115	0.6222	0.9637	0.832467	0.1812	0.1647	0.1311	0.159	0.9392	1.1514	0.9595	1.0915	1.1569	1.1366	1.07252	0.68	0.6474	0.9696	0.9224	0.8516	0.9213	0.83205
37.3 °C	28077s	7.79917		0.9125	0.6244	0.9651	0.834	0.1871	0.17	0.1344	0.163833	0.9404	1.1527	0.964	1.0919	1.1589	1.1388	1.07445	0.682	0.6498	0.9713	0.9219	0.8522	0.9223	0.83325
37.3 °C	28218s	7.83833		0.913	0.6261	0.9676	0.835567	0.1937	0.1752	0.1374	0.168767	0.9447	1.155	0.9667	1.0966	1.1621	1.142	1.07785	0.6847	0.6541	0.9733	0.9208	0.855	0.9242	0.83535
37.2 °C	28358s	7.87722		0.9156	0.6277	0.9673	0.836867	0.1996	0.1805	0.1407	0.1736	0.9454	1.1567	0.9678	1.0967	1.1652	1.1443	1.07935	0.6864	0.6536	0.9737	0.9257	0.8511	0.9233	0.835633
37.3 °C	28498s	7.91611		0.9161	0.6304	0.9707	0.839067	0.2063	0.1865	0.1441	0.178967	0.949	1.1568	0.9704	1.1011	1.1673	1.147	1.08193	0.6882	0.6567	0.9767	0.9266	0.8563	0.9269	0.838567
37.3 °C	28639s	7.95528		0.9173	0.6339	0.9722	0.841133	0.2139	0.1923	0.1475	0.184567	0.9498	1.1604	0.9734	1.1037	1.1717	1.1511	1.08502	0.6909	0.6582	0.9769	0.9289	0.8576	0.9282	0.840117
37.2 °C	28779s	7.99417		0.92	0.6389	0.9731	0.844	0.2214	0.1989	0.151	0.190433	0.954	1.1618	0.9751	1.1085	1.1748	1.1534	1.08793	0.6921	0.6608	0.9783	0.9316	0.8598	0.9282	0.8418
37.3 °C	28919s	8.03306		0.921	0.638	0.9753	0.844767	0.2293	0.2053	0.1551	0.196567	0.9551	1.1633	0.9816	1.1084	1.1763	1.1597	1.09073	0.6954	0.6629	0.9802	0.9312	0.8582	0.9325	0.8434
37.3 °C	29060s	8.07222		0.9221	0.6418	0.9764	0.846767	0.2382	0.2128	0.1594	0.203467	0.9586	1.1654	0.9811	1.1139	1.182	1.16	1.0935	0.6967	0.6653	0.9806	0.9341	0.8621	0.9318	0.8451
37.3 °C	29200s	8.11111		0.924	0.6476	0.9769	0.8495	0.2463	0.2201	0.1642	0.2102	0.9633	1.1664	0.9859	1.1191	1.1831	1.1649	1.09712	0.6983	0.6673	0.9818	0.9375	0.8627	0.9333	0.846817
37.3 °C	29341s	8.15028		0.9262	0.6449	0.9789	0.85	0.2556	0.2282	0.1693	0.2177	0.9642	1.1709	0.9899	1.1204	1.1874	1.1696	1.1004	0.7009	0.6702	0.9837	0.9388	0.8642	0.9362	0.849
37.3 °C	29481s	8.18917		0.9282	0.6483	0.981	0.8525	0.2653	0.2364	0.1743	0.225333	0.9697	1.1694	0.9924	1.1252	1.189	1.1704	1.10268	0.7032	0.6727	0.986	0.9378	0.8662	0.9381	0.850667
37.3 °C	29621s	8.22806		0.9295	0.6496	0.9828	0.853967	0.2745	0.2451	0.1801	0.233233	0.9703	1.1725	0.9953	1.1264	1.1922	1.1735	1.10503	0.7046	0.6751	0.9882	0.9405	0.8664	0.9412	0.852667
37.3 °C	29762s	8.26722		0.9316	0.6521	0.9851	0.856267	0.2838	0.2545	0.1855	0.241267	0.9709	1.1738	0.9964	1.127	1.1956	1.1755	1.10653	0.707	0.6755	0.9885	0.9444	0.8673	0.9407	0.8539
37.3 °C	29902s	8.30611		0.9333	0.6573	0.986	0.858867	0.2948	0.263	0.1914	0.249733	0.9778	1.1731	0.9991	1.1353	1.1975	1.1792	1.11033	0.7094	0.6806	0.9903	0.9447	0.8731	0.9435	0.856933
37.2 °C	30042s	8.345		0.9347	0.6577	0.9869	0.859767	0.3038	0.2714	0.1971	0.257433	0.9783	1.1768	1.0034	1.1337	1.2007	1.1823	1.11253	0.7102	0.6811	0.991	0.9468	0.8717	0.9438	0.857433
37.3 °C	30183s	8.38417		0.937	0.6627	0.9895	0.863067	0.3145	0.2816	0.2036	0.266567	0.9843	1.1773	1.0044	1.1403	1.202	1.1839	1.11537	0.7125	0.6843	0.9935	0.9488	0.875	0.948	0.86035
37.2 °C	30323s	8.42306		0.9385	0.6645	0.9888	0.863933	0.3253	0.2913	0.2106	0.275733	0.9861	1.1798	1.0063	1.1441	1.2066	1.1856	1.11808	0.7146	0.688	0.9932	0.9499	0.8787	0.9475	0.861983
37.2 °C	30464s	8.46222		0.9397	0.6674	0.9902	0.865767	0.3344	0.3012	0.2175	0.284367	0.9856	1.1822	1.0111	1.142	1.2092	1.1895	1.11993	0.7156	0.6888	0.994	0.951	0.8778	0.9489	0.862683
37.2 °C	30604s	8.50111		0.9403	0.6692	0.9923	0.867267	0.3444	0.3119	0.2259	0.294067	0.9897	1.1818	1.0104	1.1461	1.2096	1.1885	1.12102	0.7171	0.6911	0.9957	0.952	0.8798	0.9505	0.864367
37.3 °C	30744s	8.54		0.9427	0.668	0.9961	0.868933	0.3531	0.3218	0.2335	0.3028	0.989	1.1854	1.0154	1.1474	1.2139	1.1939	1.12417	0.7194	0.6912	0.9986	0.9534	0.879	0.9538	0.8659
37.3 °C	30885s	8.57917		0.9452	0.6729	0.9971	0.871733	0.3626	0.3315	0.2415	0.311867	0.9903	1.1846	1.0183	1.1496	1.2156	1.1972	1.12593	0.7208	0.6946	0.9998	0.956	0.8806	0.9554	0.867867
37.3 °C	31025s	8.61806		0.9469	0.6769	0.9968	0.873533	0.372	0.3413	0.2497	0.321	0.9945	1.1873	1.0208	1.1542	1.2186	1.1986	1.129	0.7232	0.6992	0.9998	0.9576	0.8853	0.9557	0.870133
37.3 °C	31165s	8.65694		0.9479	0.6785	0.9987	0.875033	0.3809	0.3502	0.2583	0.3298	0.997	1.1923	1.0217	1.1574	1.2231	1.2021	1.13227	0.7249	0.7008	1.0019	0.9603	0.8863	0.9573	0.871917
37.3 °C	31306s	8.69611		0.9498	0.6809	1.0002	0.876967	0.3905	0.359	0.2672	0.3389	0.9993	1.1911	1.0238	1.1595	1.2215	1.2025	1.13295	0.7268	0.7023	1.0024	0.9607	0.888	0.9583	0.873083
37.2 °C	31446s	8.735		0.951	0.6832	1.0012	0.878467	0.4015	0.3672	0.277	0.348567	1.0044	1.19	1.0243	1.1629	1.2219	1.2031	1.13443	0.7284	0.7066	1.0033	0.9599	0.8897	0.9598	0.874617
37.3 °C	31586s	8.77389		0.9523	0.6869	1.0039	0.881033	0.4117	0.3767	0.2862	0.3582	1.0026	1.196	1.0309	1.1641	1.2286	1.208	1.13837	0.7305	0.7056	1.0065	0.9621	0.8904	0.9624	0.87625
37.3 °C	31727s	8.81306		0.9549	0.6886	1.0048	0.882767	0.421	0.3874	0.2964	0.368267	1.0092	1.1971	1.0321	1.1696	1.2307	1.2096	1.14138	0.7322	0.7112	1.0077	0.9643	0.8945	0.9633	0.878867
37.2 °C	31867s	8.85194		0.9557	0.6939	1.0061	0.885233	0.4291	0.3996	0.3052	0.377967	1.0101	1.1995	1.0345	1.1706	1.2326	1.2128	1.14335	0.7329	0.7118	1.0085	0.9664	0.8962	0.9656	0.880233
37.4 °C	32008s	8.89111		0.9585	0.6921	1.007	0.885867	0.4362	0.4085	0.3142	0.3863	1.0115	1.1996	1.0349	1.1733	1.234	1.213	1.14438	0.7344	0.7126	1.0097	0.9694	0.8957	0.9675	0.88155
37.3 °C	32148s	8.93		0.9592	0.6963	1.0085	0.888	0.445	0.4178	0.324	0.3956	1.0147	1.2016	1.0401	1.177	1.2367	1.2174	1.14792	0.7361	0.7165	1.0111	0.9702	0.8982	0.9673	0.883233
37.3 °C	32288s	8.96889		0.9618	0.6969	1.0095	0.8894	0.454	0.4249	0.3331	0.404	1.0156	1.204	1.0407	1.1792	1.2386	1.2187	1.14947	0.7379	0.7177	1.0127	0.9717	0.8988	0.9702	0.884833
37.3 °C	32429s	9.00806		0.9626	0.7026	1.0122	0.892467	0.463	0.4336	0.3409	0.4125	1.0206	1.2021	1.0427	1.1839	1.2395	1.2213	1.15168	0.7395	0.7222	1.0138	0.9729	0.9028	0.9713	0.887083
37.2 °C	32569s	9.04694		0.965	0.7018	1.0126	0.893133	0.4661	0.4413	0.3494	0.418933	1.0211	1.2043	1.0446	1.1853	1.2421	1.2229	1.15338	0.7411	0.7224	1.0155	0.9751	0.9015	0.9715	0.88785
37.3 °C	32712s	9.08667		0.9671	0.6993	1.0151	0.893833	0.4815	0.4488	0.3587	0.429667	1.0217	1.2049	1.0452	1.1875	1.2434	1.2245	1.15453	0.7428	0.7245	1.017	0.9771	0.9036	0.9745	0.889917
37.2 °C	32855s	9.12639		0.9688	0.7079	1.0168	0.897833	0.4908	0.4562	0.371	0.439333	1.0235	1.2086	1.0482	1.1913	1.2471	1.2274	1.15768	0.7445	0.7272	1.0187	0.9792	0.9057	0.9768	0.892017
37.2 °C	32996s	9.16556		0.9707	0.7108	1.0171	0.899533	0.4986	0.4636	0.3815	0.4479	1.0261	1.209	1.0475	1.1938	1.2473	1.2277	1.15857	0.7459	0.7293	1.0196	0.9806	0.9084	0.977	0.893467
37.2 °C	33136s	9.20444		0.9717	0.7125	1.0194	0.9012	0.5065	0.4722	0.3914	0.4567	1.0301	1.2082	1.0492	1.1977	1.2488	1.2305	1.16075	0.7476	0.7325	1.0212	0.9791	0.9103	0.9793	0.895
37.2 °C	33276s	9.24333		0.9737	0.7145	1.0212	0.903133	0.5133	0.4814	0.401	0.465233	1.028	1.2106	1.0544	1.1989	1.2526	1.2336	1.16302	0.7494	0.7322	1.0229	0.9808	0.9091	0.9819	0.89605
37.2 °C	33417s	9.2825		0.9739	0.7159	1.0213	0.9037	0.5212	0.4906	0.4103	0.474033	1.0359	1.2111	1.0546	1.2054	1.254	1.2344	1.1659	0.7507	0.7384	1.0235	0.9816	0.9146	0.9828	0.8986
37.2 °C	33557s	9.32139		0.9765	0.72	1.0227	0.9064	0.5284	0.4986	0.4181	0.4817	1.0384	1.2126	1.0573	1.2091	1.2563	1.2379	1.1686	0.7521	0.7396	1.0239	0.9839	0.9168	0.9838	0.900017
37.3 °C	33698s	9.36056		0.9783	0.7191	1.0247	0.907367	0.5343	0.5053	0.4255	0.488367	1.038	1.2157	1.0566	1.2081	1.2598	1.2381	1.16938	0.7538	0.7399	1.026	0.9864	0.9166	0.9855	0.901367
37.3 °C	33838s	9.39944		0.9797	0.7244	1.0252	0.909767	0.5376	0.5126	0.436	0.4954	1.0442	1.2168	1.0619	1.2135	1.259	1.2419	1.17288	0.7558	0.7449	1.0267	0.9886	0.9194	0.9861	0.903583
37.3 °C	33978s	9.43833		0.9816	0.7276	1.0257	0.911633	0.5417	0.5194	0.445	0.502033	1.045	1.2179	1.0618	1.2148	1.2607	1.2432	1.1739	0.7564	0.7458	1.0278	0.9892	0.9216	0.9879	0.904783
37.3 °C	34119s	9.4775		0.9826	0.7294	1.0273	0.9131	0.5491	0.5241	0.4551	0.509433	1.0472	1.219	1.0617	1.2192	1.2625	1.2443	1.17565	0.7587	0.747	1.0295	0.9912	0.9214	0.9882	0.906
37.2 °C	34259s	9.51639		0.9842	0.7269	1.03	0.9137	0.5534	0.5282	0.4654	0.515667	1.0466	1.2192	1.0627	1.2182	1.2638	1.2457	1.17603	0.7601	0.7482	1.0314	0.9917	0.922	0.9919	0.90755
37.3 °C	34399s	9.55528		0.9862	0.7319	1.0308	0.9163	0.5586	0.5324	0.4756	0.5222	1.0478	1.2225	1.0632	1.2202	1.2672	1.2469	1.17797	0.7618	0.751	1.0325	0.9936	0.9247	0.9927	0.909383
37.3 °C	34540s	9.59444		0.9874	0.7323	1.0307	0.9168	0.5635	0.5367	0.485	0.5284	1.0511	1.2239	1.0664	1.2228	1.2677	1.2492	1.18018	0.7629	0.7543	1.0334	0.9955	0.9264	0.9948	0.911217
37.3 °C	34680s	9.63333		0.9891	0.7367	1.0322	0.919333	0.5687	0.5414	0.492	0.534033	1.0531	1.2244	1.0667	1.2261	1.2691	1.2514	1.1818	0.7653	0.7551	1.034	0.9962	0.9276	0.9945	0.912117
37.3 °C	34821s	9.6725		0.991	0.7367	1.0337	0.920467	0.5748	0.5466	0.5001	0.5405	1.053	1.2236	1.0664	1.2274	1.2687	1.2514	1.18175	0.7661	0.7571	1.0351	0.9968	0.9288	0.9968	0.91345
37.2 °C	34961s	9.71139		0.9921	0.7373	1.0354	0.9216	0.5811	0.5533	0.5072	0.5472	1.0556	1.2275	1.0675	1.2299	1.2724	1.2516	1.18408	0.7679	0.7576	1.037	0.9977	0.93	0.9983	0.91475
37.2 °C	35101s	9.75028		0.9931	0.7423	1.0358	0.923733	0.5865	0.5578	0.5131	0.552467	1.0551	1.2288	1.0679	1.2322	1.2737	1.2541	1.1853	0.7696	0.7622	1.0379	0.9988	0.9329	0.9986	0.916667
37.4 °C	35242s	9.78944		0.9947	0.7428	1.0369	0.9248	0.5926	0.5641	0.5219	0.559533	1.0618	1.2297	1.0717	1.2376	1.276	1.2569	1.18895	0.7711	0.7638	1.038	1.0005	0.9345	1.0004	0.91805
37.4 °C	35382s	9.82833		0.9959	0.7452	1.0385	0.926533	0.5995	0.5696	0.5275	0.565533	1.0634	1.2315	1.0726	1.2381	1.2782	1.2593	1.19052	0.7723	0.7641	1.0402	1.0024	0.9351	1.0023	0.9194
37.2 °C	35522s	9.86722		0.9973	0.7472	1.0392	0.9279	0.6077	0.5735	0.5322	0.571133	1.0647	1.2318	1.0741	1.2413	1.2788	1.2597	1.19173	0.7735	0.767	1.0406	1.0025	0.9362	1.0023	0.92035
37.3 °C	35663s	9.90639		0.9999	0.7472	1.0399	0.929	0.6165	0.5796	0.5373	0.5778	1.0639	1.2333	1.0779	1.2415	1.2794	1.2632	1.1932	0.7752	0.7682	1.0419	1.0044	0.9376	1.0052	0.922083
37.1 °C	35803s	9.94528		1.0005	0.7487	1.0412	0.930133	0.6222	0.5832	0.5411	0.582167	1.068	1.2335	1.0777	1.2452	1.2802	1.264	1.19477	0.7768	0.7697	1.0429	1.0051	0.9381	1.0063	0.92315
37.3 °C	35944s	9.98444		1.0024	0.751	1.0428	0.932067	0.6274	0.5921	0.5477	0.589067	1.0666	1.2344	1.0758	1.2458	1.2821	1.2631	1.19463	0.7771	0.773	1.0441	1.0075	0.9403	1.0068	0.9248
37.3 °C	36084s	10.0233		1.0032	0.7518	1.0435	0.932833	0.6351	0.6013	0.5537	0.5967	1.0726	1.2357	1.0758	1.249	1.2827	1.2641	1.19665	0.7794	0.7747	1.0451	1.0089	0.9417	1.007	0.926133
37.3 °C	36224s	10.0622		1.0046	0.7566	1.0444	0.9352	0.6396	0.6086	0.5592	0.602467	1.0718	1.2363	1.0791	1.2502	1.2838	1.2669	1.19802	0.7801	0.7749	1.0455	1.0085	0.9423	1.0084	0.926617
37.3 °C	36365s	10.1014		1.0065	0.7566	1.0459	0.936333	0.6454	0.6144	0.5647	0.608167	1.0727	1.2378	1.0803	1.2523	1.2856	1.2687	1.19957	0.7825	0.7768	1.0477	1.0116	0.9445	1.0111	0.929033
37.3 °C	36505s	10.1403		1.0072	0.7574	1.0463	0.936967	0.6507	0.6211	0.5706	0.614133	1.076	1.2395	1.0818	1.2535	1.2871	1.2694	1.20122	0.7835	0.7779	1.0474	1.0105	0.9443	1.0107	0.92905
37.1 °C	36645s	10.1792		1.0079	0.7598	1.048	0.938567	0.656	0.6264	0.5783	0.620233	1.0794	1.2412	1.0852	1.2566	1.2877	1.2716	1.20362	0.7854	0.7811	1.0493	1.0113	0.9471	1.0127	0.93115
37.3 °C	36786s	10.2183		1.0098	0.7627	1.0494	0.940633	0.6611	0.631	0.5843	0.625467	1.0817	1.2412	1.0829	1.2596	1.2908	1.2723	1.20475	0.7866	0.7831	1.0504	1.014	0.9486	1.0136	0.932717
37.2 °C	36926s	10.2572		1.0114	0.7665	1.0504	0.942767	0.6673	0.6352	0.5942	0.632233	1.084	1.2423	1.0864	1.2624	1.2912	1.274	1.20672	0.7876	0.7843	1.0517	1.0142	0.9497	1.0151	0.933767
37.3 °C	37067s	10.2964		1.0121	0.7676	1.0512	0.943633	0.673	0.6412	0.6035	0.639233	1.0844	1.2427	1.0863	1.2629	1.2905	1.2753	1.20702	0.7889	0.7868	1.054	1.0145	0.9509	1.0173	0.9354
37.2 °C	37207s	10.3353		1.0142	0.7663	1.0523	0.944267	0.6771	0.6467	0.6099	0.644567	1.0846	1.2451	1.0871	1.2623	1.2931	1.276	1.20803	0.7909	0.7876	1.0543	1.0184	0.9511	1.0181	0.936733
37.3 °C	37347s	10.3742		1.0152	0.7717	1.054	0.946967	0.6833	0.6517	0.6164	0.650467	1.0865	1.2461	1.0868	1.2652	1.2946	1.2761	1.20922	0.7916	0.7901	1.0547	1.0174	0.9522	1.0188	0.937467
37.2 °C	37488s	10.4133		1.0162	0.7724	1.0536	0.9474	0.6879	0.6565	0.6217	0.655367	1.0853	1.2491	1.0912	1.2659	1.2969	1.2797	1.21135	0.7935	0.7913	1.0562	1.0185	0.9539	1.0208	0.939033
37.2 °C	37628s	10.4522		1.0173	0.7735	1.0549	0.948567	0.6939	0.6618	0.6268	0.660833	1.0928	1.2481	1.0908	1.2708	1.2971	1.2791	1.21312	0.7939	0.7943	1.0564	1.0181	0.9551	1.0199	0.939617
37.3 °C	37768s	10.4911		1.0179	0.7737	1.0559	0.949167	0.6992	0.668	0.6325	0.666567	1.0933	1.252	1.094	1.2718	1.2994	1.2816	1.21535	0.7951	0.7948	1.0578	1.0187	0.9553	1.0212	0.940483
37.2 °C	37909s	10.5303		1.0199	0.7756	1.0554	0.9503	0.7052	0.673	0.6375	0.6719	1.1008	1.2524	1.0955	1.2755	1.3	1.2833	1.21792	0.7967	0.7961	1.0572	1.0234	0.9558	1.022	0.941867
37.2 °C	38049s	10.5692		1.0205	0.7795	1.0577	0.952567	0.7107	0.6777	0.6422	0.676867	1.1003	1.2528	1.097	1.2762	1.3004	1.2841	1.21847	0.7976	0.7966	1.0596	1.0219	0.9567	1.023	0.942567
37.2 °C	38190s	10.6083		1.0226	0.7815	1.059	0.954367	0.7142	0.6823	0.6472	0.681233	1.0976	1.2562	1.1012	1.2755	1.3035	1.2873	1.22022	0.7999	0.8	1.0613	1.0233	0.959	1.0261	0.944933
37.4 °C	38330s	10.6472		1.0232	0.7847	1.0598	0.9559	0.7216	0.6877	0.6528	0.687367	1.1058	1.2557	1.1004	1.2807	1.3034	1.2869	1.22215	0.8011	0.8025	1.0615	1.0252	0.9617	1.0252	0.9462
37.3 °C	38470s	10.6861		1.0247	0.7845	1.0603	0.9565	0.7252	0.694	0.6582	0.692467	1.1054	1.257	1.1023	1.2809	1.3059	1.2882	1.22328	0.8022	0.8017	1.0627	1.0242	0.9618	1.0271	0.946617
37.2 °C	38611s	10.7253		1.0262	0.7863	1.061	0.957833	0.7327	0.6994	0.6633	0.698467	1.11	1.2603	1.1065	1.2854	1.308	1.2906	1.2268	0.8029	0.805	1.0643	1.027	0.963	1.0281	0.948383
37.2 °C	38751s	10.7642		1.0273	0.7893	1.0617	0.959433	0.7371	0.7036	0.6676	0.702767	1.1128	1.2611	1.107	1.2853	1.3094	1.2919	1.22792	0.805	0.807	1.0655	1.028	0.9655	1.029	0.95
37.3 °C	38891s	10.8031		1.0285	0.7878	1.0616	0.9593	0.7416	0.7075	0.6712	0.706767	1.1146	1.2613	1.1055	1.287	1.3086	1.2909	1.22798	0.8057	0.8077	1.0655	1.0285	0.9655	1.029	0.950317
37.3 °C	39032s	10.8422		1.0286	0.7911	1.0631	0.960933	0.7469	0.7138	0.6776	0.712767	1.1123	1.2624	1.1088	1.2856	1.3093	1.293	1.22857	0.8065	0.8091	1.0665	1.0297	0.9652	1.0309	0.951317
37.2 °C	39172s	10.8811		1.0307	0.7925	1.0647	0.962633	0.7524	0.7176	0.6822	0.7174	1.1146	1.2632	1.1062	1.2865	1.3098	1.2919	1.2287	0.8086	0.8104	1.0672	1.029	0.9665	1.0323	0.952333
37.2 °C	39312s	10.92		1.0308	0.7918	1.065	0.962533	0.7562	0.7231	0.6854	0.721567	1.113	1.2652	1.107	1.2873	1.3111	1.2935	1.22952	0.8095	0.8119	1.0683	1.0319	0.967	1.0333	0.95365
37.4 °C	39453s	10.9592		1.0323	0.7961	1.0671	0.965167	0.7612	0.727	0.6908	0.726333	1.1131	1.265	1.1074	1.2866	1.3105	1.2938	1.2294	0.8109	0.8138	1.07	1.031	0.9692	1.0346	0.954917
37.3 °C	39593s	10.9981		1.0344	0.7965	1.0665	0.9658	0.7684	0.7339	0.6971	0.733133	1.1158	1.2653	1.1093	1.2912	1.3129	1.2953	1.23163	0.812	0.8165	1.0712	1.0344	0.9699	1.035	0.9565
37.3 °C	39734s	11.0372		1.0356	0.7957	1.0669	0.966067	0.7717	0.7383	0.7009	0.736967	1.1171	1.2693	1.1113	1.2912	1.3157	1.2981	1.23378	0.8126	0.8153	1.0715	1.0354	0.9689	1.037	0.956783
37.3 °C	39874s	11.0761		1.0362	0.7992	1.0673	0.967567	0.7773	0.7428	0.7052	0.741767	1.1186	1.2701	1.113	1.2935	1.3162	1.2996	1.23517	0.8138	0.8179	1.0712	1.0354	0.9705	1.0366	0.957567
37.3 °C	40014s	11.115		1.0369	0.8024	1.0692	0.9695	0.7821	0.7472	0.7107	0.746667	1.1197	1.2703	1.1133	1.2937	1.315	1.2994	1.23523	0.815	0.8212	1.0736	1.0356	0.9738	1.039	0.9597
37.2 °C	40155s	11.1542		1.0384	0.801	1.0687	0.969367	0.7886	0.7528	0.7148	0.752067	1.1253	1.2714	1.1134	1.2985	1.317	1.3004	1.23767	0.8155	0.8218	1.0737	1.0372	0.9746	1.039	0.9603
37.3 °C	40295s	11.1931		1.0388	0.8052	1.0704	0.971467	0.7923	0.7588	0.7193	0.7568	1.1254	1.2705	1.1133	1.2981	1.3168	1.3012	1.23755	0.8169	0.8235	1.0747	1.0365	0.9738	1.0401	0.960917
37.3 °C	40435s	11.2319		1.0397	0.8027	1.0719	0.971433	0.7977	0.7631	0.7237	0.7615	1.1215	1.2734	1.1164	1.2965	1.3177	1.3012	1.23778	0.8181	0.824	1.0756	1.0382	0.9748	1.0419	0.9621
37.2 °C	40576s	11.2711		1.0408	0.8078	1.0702	0.972933	0.8043	0.7696	0.7301	0.768	1.1281	1.2735	1.1165	1.3015	1.3199	1.301	1.24008	0.8196	0.826	1.075	1.0389	0.9775	1.0407	0.96295
37.2 °C	40716s	11.31		1.0426	0.8065	1.0703	0.973133	0.8097	0.7728	0.7321	0.771533	1.1314	1.2758	1.1166	1.3032	1.3213	1.3034	1.24195	0.821	0.8278	1.076	1.0401	0.978	1.042	0.96415
37.3 °C	40857s	11.3492		1.0435	0.8086	1.0718	0.974633	0.8134	0.7785	0.7382	0.7767	1.1299	1.2767	1.1158	1.3043	1.3225	1.3048	1.24233	0.8215	0.8297	1.0767	1.0409	0.9793	1.0426	0.965117
37.2 °C	40997s	11.3881		1.044	0.8114	1.0734	0.976267	0.8175	0.7827	0.7416	0.7806	1.1306	1.278	1.1195	1.305	1.3237	1.3057	1.24375	0.8226	0.828	1.0789	1.041	0.9776	1.0445	0.965433
37.4 °C	41137s	11.4269		1.0462	0.8116	1.0729	0.9769	0.8235	0.7867	0.7456	0.785267	1.1339	1.2752	1.1164	1.3066	1.3227	1.3048	1.24327	0.8238	0.8311	1.0786	1.0428	0.9796	1.0446	0.96675
37.4 °C	41278s	11.4661		1.0461	0.8139	1.0741	0.978033	0.8281	0.7925	0.7501	0.790233	1.135	1.2805	1.1185	1.3076	1.3255	1.3057	1.24547	0.8242	0.833	1.0801	1.0442	0.9818	1.0465	0.9683
37.3 °C	41418s	11.505		1.0468	0.8135	1.0744	0.978233	0.8329	0.797	0.754	0.794633	1.1342	1.2795	1.119	1.3079	1.3259	1.3069	1.24557	0.826	0.8327	1.0803	1.0433	0.9801	1.0463	0.968117
37.3 °C	41558s	11.5439		1.0478	0.818	1.0744	0.980067	0.8377	0.8002	0.7569	0.798267	1.1379	1.28	1.1204	1.3084	1.3256	1.3088	1.24685	0.8269	0.836	1.0808	1.0423	0.9826	1.0472	0.9693
37.3 °C	41699s	11.5831		1.0494	0.8188	1.0764	0.981533	0.8425	0.805	0.7613	0.802933	1.1384	1.282	1.1194	1.3103	1.3277	1.3085	1.24772	0.8286	0.8377	1.0818	1.0449	0.9848	1.0487	0.971083
37.2 °C	41839s	11.6219		1.0509	0.8211	1.0758	0.9826	0.8476	0.8095	0.7645	0.8072	1.1377	1.2823	1.1181	1.3108	1.3282	1.3088	1.24765	0.8299	0.8381	1.0823	1.0444	0.984	1.0493	0.971333
37.2 °C	41980s	11.6611		1.0509	0.8185	1.0772	0.9822	0.8524	0.8141	0.7684	0.811633	1.1369	1.2839	1.1206	1.3103	1.3293	1.3085	1.24825	0.8314	0.8387	1.0842	1.045	0.9844	1.051	0.97245
37.2 °C	42120s	11.7		1.0524	0.8183	1.0763	0.982333	0.857	0.8194	0.7734	0.8166	1.1404	1.2839	1.1224	1.312	1.3306	1.3112	1.25008	0.8328	0.8395	1.0835	1.046	0.9842	1.0497	0.972617
37.3 °C	42260s	11.7389		1.0532	0.8234	1.0779	0.984833	0.8615	0.8234	0.776	0.8203	1.1401	1.2851	1.1216	1.3143	1.3315	1.3112	1.25063	0.8344	0.8413	1.0846	1.0472	0.9856	1.0512	0.97405
37.3 °C	42401s	11.7781		1.0539	0.8258	1.0786	0.9861	0.8671	0.8289	0.7804	0.825467	1.1413	1.2865	1.1206	1.3143	1.332	1.3124	1.25118	0.8351	0.843	1.0856	1.0476	0.9885	1.0528	0.975433
37.4 °C	42541s	11.8169		1.0546	0.8235	1.0774	0.985167	0.8719	0.8321	0.7835	0.829167	1.1414	1.286	1.1216	1.3139	1.3319	1.3118	1.2511	0.8364	0.8433	1.0848	1.0476	0.9869	1.0524	0.975233
37.2 °C	42681s	11.8558		1.0556	0.8284	1.0781	0.987367	0.8777	0.8355	0.7863	0.833167	1.1452	1.2864	1.1243	1.3179	1.3322	1.3135	1.25325	0.8383	0.8456	1.0859	1.0477	0.9895	1.054	0.976833
37.3 °C	42822s	11.895		1.0555	0.8258	1.079	0.986767	0.8839	0.8409	0.7903	0.838367	1.1472	1.2877	1.1247	1.3185	1.3334	1.3138	1.25422	0.8408	0.8466	1.087	1.0478	0.9899	1.0552	0.977883
37.2 °C	42962s	11.9339		1.0566	0.8296	1.0796	0.9886	0.8893	0.846	0.7946	0.8433	1.1496	1.2886	1.1256	1.32	1.3351	1.3149	1.25563	0.8425	0.8486	1.0878	1.0478	0.9906	1.0556	0.978817
37.4 °C	43102s	11.9728		1.0575	0.8277	1.0797	0.9883	0.893	0.8516	0.7987	0.847767	1.147	1.2899	1.1259	1.3199	1.3364	1.3162	1.25588	0.8453	0.8478	1.0877	1.05	0.9896	1.0543	0.979117
37.3 °C	43243s	12.0119		1.0581	0.8294	1.0803	0.989267	0.8996	0.8541	0.8008	0.8515	1.1487	1.2918	1.1253	1.3206	1.3373	1.3155	1.25653	0.8467	0.8491	1.088	1.0505	0.9915	1.0557	0.98025
37.2 °C	43383s	12.0508		1.0596	0.8307	1.0806	0.9903	0.9045	0.8591	0.8055	0.856367	1.1514	1.2906	1.1281	1.3226	1.337	1.3185	1.25803	0.8488	0.8497	1.089	1.0513	0.9915	1.0564	0.981117
37.2 °C	43524s	12.09		1.0605	0.8341	1.0807	0.991767	0.91	0.8649	0.8091	0.861333	1.1514	1.2938	1.1302	1.3234	1.3403	1.3196	1.25978	0.8502	0.851	1.0897	1.0508	0.9923	1.057	0.981833
37.2 °C	43664s	12.1289		1.061	0.8342	1.0811	0.9921	0.9168	0.8695	0.812	0.8661	1.1557	1.2946	1.131	1.3257	1.3416	1.3194	1.26133	0.8514	0.8523	1.0891	1.0511	0.9927	1.0562	0.982133
37.1 °C	43804s	12.1678		1.0618	0.8351	1.0812	0.9927	0.921	0.8723	0.8152	0.8695	1.1574	1.2936	1.1315	1.3255	1.3405	1.32	1.26142	0.8531	0.8541	1.0898	1.0523	0.9944	1.058	0.983617
37.2 °C	43945s	12.2069		1.0618	0.8359	1.0814	0.993033	0.9257	0.8772	0.8184	0.873767	1.1591	1.2951	1.1324	1.3258	1.3421	1.3208	1.26255	0.8542	0.8548	1.0906	1.0527	0.9935	1.0579	0.98395
37.2 °C	44085s	12.2458		1.0628	0.8374	1.0822	0.994133	0.9321	0.8805	0.8209	0.877833	1.1637	1.2947	1.1352	1.3289	1.3416	1.3219	1.26433	0.8554	0.8572	1.0916	1.0522	0.9964	1.0598	0.985433
37.3 °C	44225s	12.2847		1.0636	0.8415	1.0823	0.9958	0.9345	0.8856	0.824	0.881367	1.1615	1.2971	1.1347	1.3282	1.3429	1.3219	1.26438	0.856	0.8576	1.0916	1.053	0.9968	1.0597	0.985783
37.1 °C	44366s	12.3239		1.0638	0.8408	1.0831	0.9959	0.9408	0.8897	0.8276	0.886033	1.1633	1.2967	1.1368	1.3295	1.3431	1.3223	1.26528	0.8558	0.8583	1.092	1.0533	0.9971	1.0603	0.986133
37.3 °C	44506s	12.3628		1.0643	0.8437	1.0829	0.996967	0.9479	0.893	0.8298	0.890233	1.1662	1.297	1.1349	1.3314	1.3437	1.3232	1.26607	0.8571	0.8595	1.0924	1.0545	0.9973	1.0604	0.986867
37.2 °C	44647s	12.4019		1.0656	0.8412	1.0834	0.996733	0.9507	0.8976	0.8333	0.893867	1.1662	1.2974	1.1361	1.3305	1.3443	1.3238	1.26638	0.8574	0.859	1.0938	1.054	0.9954	1.0621	0.98695
37.3 °C	44787s	12.4408		1.0655	0.844	1.0838	0.997767	0.956	0.9024	0.8349	0.897767	1.1655	1.2979	1.1357	1.3311	1.3443	1.3236	1.26635	0.8587	0.863	1.094	1.053	0.9987	1.0621	0.98825
37.2 °C	44927s	12.4797		1.0653	0.8454	1.0853	0.998667	0.9645	0.9081	0.8384	0.903667	1.1706	1.2973	1.1361	1.334	1.3452	1.3244	1.26793	0.8594	0.8618	1.0944	1.0542	0.9987	1.0623	0.988467
37.3 °C	45068s	12.5189		1.0664	0.8463	1.085	0.999233	0.9691	0.9143	0.8413	0.908233	1.1719	1.3	1.1378	1.3361	1.3479	1.3274	1.27018	0.8598	0.8636	1.0956	1.0548	0.9992	1.064	0.9895
37.2 °C	45208s	12.5578		1.0675	0.843	1.0846	0.998367	0.9699	0.9178	0.8444	0.9107	1.1676	1.3014	1.1393	1.3338	1.3483	1.3275	1.26965	0.8592	0.8628	1.0945	1.056	0.9981	1.063	0.988933
37.2 °C	45348s	12.5967		1.0675	0.8479	1.0823	0.999233	0.9737	0.9208	0.8468	0.913767	1.17	1.3007	1.1414	1.336	1.3478	1.3287	1.27077	0.8593	0.8634	1.0952	1.056	0.9989	1.0625	0.989217
37.4 °C	45492s	12.6367		1.0689	0.849	1.0856	1.00117	0.9776	0.9267	0.8491	0.9178	1.1697	1.3016	1.1385	1.3359	1.3487	1.3267	1.27018	0.8597	0.8658	1.0959	1.057	0.9996	1.0638	0.9903
37.2 °C	45632s	12.6756		1.069	0.8495	1.0863	1.0016	0.9832	0.9303	0.8517	0.921733	1.1699	1.3026	1.1389	1.3354	1.3489	1.3279	1.2706	0.8596	0.8655	1.0961	1.0571	1.0004	1.0644	0.990517
37.2 °C	45772s	12.7144		1.0687	0.849	1.0865	1.0014	0.988	0.9368	0.8547	0.9265	1.1708	1.3015	1.1404	1.3363	1.3491	1.329	1.27118	0.8601	0.8668	1.0978	1.0555	1.0007	1.0653	0.991033
37.4 °C	45913s	12.7536		1.0694	0.8514	1.0869	1.00257	0.9948	0.9414	0.8577	0.9313	1.1764	1.3028	1.1369	1.3386	1.35	1.3271	1.27197	0.8606	0.8705	1.0972	1.0571	1.0022	1.0655	0.992183
37.3 °C	46053s	12.7925		1.0706	0.8545	1.0867	1.00393	0.9972	0.9477	0.8598	0.9349	1.1731	1.3029	1.1376	1.3383	1.3503	1.33	1.27203	0.8612	0.8706	1.0971	1.0586	1.0036	1.0654	0.99275
37.3 °C	46193s	12.8314		1.071	0.8537	1.0874	1.00403	1.0035	0.9525	0.8608	0.938933	1.1773	1.3035	1.1389	1.3424	1.3509	1.3291	1.27368	0.8616	0.8712	1.0979	1.0585	1.0033	1.0662	0.993117
37.3 °C	46334s	12.8706		1.0708	0.8533	1.0868	1.00363	1.0037	0.9577	0.864	0.9418	1.1749	1.3041	1.1387	1.3399	1.3522	1.331	1.27347	0.8606	0.8715	1.0986	1.0581	1.0035	1.0659	0.993033
37.2 °C	46474s	12.9094		1.0713	0.8516	1.0876	1.0035	1.0079	0.9635	0.8675	0.9463	1.1776	1.3048	1.1389	1.3416	1.352	1.332	1.27448	0.8608	0.8718	1.0987	1.0585	1.0029	1.0663	0.993167
37.3 °C	46615s	12.9486		1.0728	0.8557	1.0889	1.0058	1.0109	0.9681	0.8699	0.949633	1.1741	1.3043	1.1404	1.3413	1.3541	1.3332	1.27457	0.8611	0.8719	1.1006	1.0587	1.0031	1.0683	0.99395
37.2 °C	46755s	12.9875		1.0726	0.8558	1.0897	1.00603	1.0145	0.9748	0.8737	0.954333	1.1752	1.3046	1.1422	1.3432	1.3545	1.3346	1.27572	0.8619	0.8741	1.1015	1.0581	1.0039	1.0678	0.99455
37.3 °C	46895s	13.0264		1.0736	0.8566	1.0896	1.0066	1.0198	0.9806	0.8774	0.959267	1.1793	1.3055	1.1414	1.3454	1.3557	1.3354	1.27712	0.8617	0.8763	1.1014	1.0588	1.005	1.0678	0.995167
37.2 °C	47036s	13.0656		1.0734	0.856	1.0888	1.00607	1.0229	0.9848	0.8804	0.9627	1.1785	1.3054	1.1411	1.3456	1.3572	1.3357	1.27725	0.8621	0.8761	1.1015	1.0583	1.0048	1.0682	0.995167
37.2 °C	47176s	13.1044		1.0738	0.8603	1.0889	1.00767	1.0312	0.9897	0.8838	0.968233	1.1855	1.3071	1.1429	1.3497	1.3581	1.3369	1.28003	0.8631	0.8778	1.1015	1.0604	1.0067	1.0683	0.9963
37.3 °C	47316s	13.1433		1.0747	0.8595	1.0895	1.0079	1.0335	0.9927	0.8859	0.9707	1.1852	1.3068	1.1405	1.3476	1.3574	1.3363	1.27897	0.8626	0.8784	1.1021	1.0613	1.0066	1.0679	0.996483
37.2 °C	47457s	13.1825		1.0752	0.8602	1.0896	1.00833	1.037	1.0012	0.8884	0.975533	1.1844	1.3091	1.1459	1.3483	1.359	1.3382	1.28082	0.863	0.8777	1.1025	1.0601	1.0057	1.0687	0.996283
37.2 °C	47597s	13.2214		1.0751	0.8607	1.0891	1.0083	1.0406	1.0056	0.8906	0.978933	1.1877	1.3093	1.1477	1.3498	1.3595	1.3394	1.28223	0.8629	0.8798	1.1025	1.0611	1.0069	1.0693	0.997083
37.2 °C	47738s	13.2606		1.0753	0.8652	1.0905	1.01033	1.0437	1.0097	0.894	0.982467	1.1863	1.3095	1.1502	1.3492	1.3588	1.3393	1.28222	0.8625	0.8806	1.104	1.0604	1.0074	1.0709	0.997633
37.3 °C	47878s	13.2994		1.0752	0.8639	1.0892	1.00943	1.0511	1.0148	0.8971	0.987667	1.1914	1.3108	1.1512	1.3515	1.3606	1.3401	1.28427	0.8632	0.883	1.1036	1.0608	1.0077	1.0692	0.997917
37.2 °C	48018s	13.3383		1.0763	0.8641	1.0896	1.01	1.0493	1.0195	0.8982	0.989	1.1891	1.3107	1.154	1.3512	1.3622	1.3419	1.28485	0.8618	0.8825	1.103	1.0605	1.0075	1.0696	0.997483
37.2 °C	48159s	13.3775		1.077	0.8652	1.0901	1.01077	1.0535	1.0215	0.902	0.992333	1.19	1.3108	1.1584	1.35	1.3601	1.3419	1.2852	0.8627	0.8819	1.1036	1.0626	1.0081	1.07	0.99815
37.1 °C	48299s	13.4164		1.0775	0.8671	1.0895	1.01137	1.0566	1.0276	0.9042	0.996133	1.1927	1.3131	1.1569	1.3507	1.3619	1.3415	1.28613	0.8632	0.8856	1.1055	1.0621	1.0085	1.0713	0.999367
37.3 °C	48439s	13.4553		1.0763	0.8666	1.09	1.01097	1.0632	1.0331	0.907	1.0011	1.1924	1.3137	1.1576	1.3517	1.363	1.3421	1.28675	0.8628	0.8855	1.1053	1.0609	1.0087	1.0712	0.999067
37.2 °C	48580s	13.4944		1.0775	0.8669	1.0898	1.0114	1.0656	1.0354	0.9081	1.00303	1.1918	1.3131	1.1592	1.352	1.3619	1.3417	1.28662	0.8634	0.8851	1.1053	1.0626	1.0077	1.0713	0.999233
37.2 °C	48720s	13.5333		1.0773	0.8691	1.0901	1.01217	1.0677	1.0378	0.9102	1.00523	1.1907	1.3131	1.1581	1.3504	1.3623	1.3414	1.286	0.8637	0.8865	1.1055	1.0636	1.0091	1.0716	1
37.3 °C	48861s	13.5725		1.078	0.8699	1.0896	1.0125	1.0726	1.0451	0.9127	1.01013	1.1936	1.3143	1.1618	1.3533	1.364	1.344	1.2885	0.8627	0.8881	1.1047	1.0635	1.0089	1.0711	0.999833
37.3 °C	49001s	13.6114		1.0784	0.8696	1.0893	1.01243	1.0742	1.0478	0.9142	1.01207	1.1896	1.3152	1.1615	1.3523	1.3645	1.3436	1.28778	0.8625	0.888	1.1053	1.0632	1.0093	1.072	1.00005
37.3 °C	49141s	13.6503		1.0783	0.8693	1.0896	1.0124	1.0817	1.0549	0.9173	1.01797	1.1928	1.3157	1.166	1.3534	1.3647	1.3447	1.28955	0.8631	0.8891	1.1051	1.0638	1.0096	1.073	1.00062
37.2 °C	49282s	13.6894		1.0794	0.8724	1.0891	1.01363	1.087	1.0554	0.9203	1.0209	1.1977	1.3156	1.1658	1.3539	1.3646	1.3443	1.29032	0.863	0.8906	1.1052	1.0666	1.0101	1.0719	1.00123
37.3 °C	49422s	13.7283		1.0795	0.8713	1.0888	1.0132	1.0875	1.0571	0.9218	1.02213	1.1903	1.3145	1.1654	1.3518	1.3631	1.3432	1.28805	0.8629	0.891	1.1056	1.0645	1.0102	1.0736	1.0013
37.2 °C	49562s	13.7672		1.0795	0.8741	1.0883	1.01397	1.096	1.0609	0.9234	1.02677	1.1961	1.3169	1.1664	1.3546	1.3643	1.344	1.29038	0.8629	0.8936	1.1057	1.0649	1.0112	1.0728	1.00185
37.3 °C	49703s	13.8064		1.0801	0.8743	1.0884	1.01427	1.0973	1.0657	0.926	1.02967	1.1937	1.3158	1.1669	1.3538	1.364	1.344	1.2897	0.864	0.8929	1.1053	1.0669	1.0098	1.0736	1.00208
37.3 °C	49843s	13.8453		1.0803	0.8762	1.0891	1.0152	1.1027	1.0674	0.9283	1.0328	1.1952	1.3161	1.168	1.3532	1.3644	1.3444	1.29022	0.8631	0.8938	1.1064	1.0653	1.0107	1.0741	1.00223
37.3 °C	49984s	13.8844		1.0821	0.8768	1.0884	1.01577	1.1045	1.0718	0.9311	1.0358	1.1931	1.318	1.1679	1.3538	1.3652	1.3445	1.29042	0.8636	0.8958	1.1054	1.0668	1.0114	1.0741	1.00285
37.3 °C	50124s	13.9233		1.0811	0.8787	1.0876	1.0158	1.1103	1.0746	0.9338	1.03957	1.1958	1.3161	1.1697	1.3553	1.3638	1.3455	1.29103	0.8629	0.8966	1.1052	1.0665	1.0118	1.074	1.00283
37.3 °C	50264s	13.9622		1.0807	0.8795	1.0874	1.01587	1.1141	1.0798	0.9346	1.04283	1.1961	1.3167	1.17	1.3546	1.3635	1.3452	1.29102	0.8632	0.8979	1.105	1.0666	1.0119	1.0746	1.0032
37.3 °C	50405s	14.0014		1.0822	0.8788	1.0873	1.0161	1.1154	1.0861	0.9373	1.04627	1.1944	1.3199	1.1699	1.3538	1.3653	1.3451	1.2914	0.8633	0.8975	1.1047	1.0681	1.0124	1.0746	1.00343
37.3 °C	50545s	14.0403		1.0816	0.8801	1.0873	1.01633	1.1199	1.0868	0.9383	1.04833	1.1948	1.3196	1.1709	1.3548	1.3661	1.345	1.29187	0.8638	0.8993	1.105	1.0689	1.0124	1.0753	1.00412
37.3 °C	50685s	14.0792		1.0826	0.8794	1.0858	1.01593	1.1249	1.087	0.9403	1.05073	1.1992	1.3189	1.1731	1.3566	1.3666	1.3475	1.29365	0.8639	0.8992	1.1041	1.0688	1.0132	1.0741	1.00388
37.3 °C	50826s	14.1183		1.0825	0.8825	1.0862	1.01707	1.1254	1.0902	0.9418	1.05247	1.1931	1.3202	1.1746	1.3552	1.366	1.3471	1.2927	0.8626	0.8982	1.1041	1.0681	1.0119	1.0746	1.00325
37.3 °C	50966s	14.1572		1.083	0.8788	1.0857	1.01583	1.1285	1.0933	0.9443	1.05537	1.1939	1.3223	1.1774	1.3544	1.3663	1.3477	1.29367	0.8635	0.8992	1.1039	1.0683	1.0112	1.0765	1.00377
37.3 °C	51106s	14.1961		1.0835	0.8829	1.0865	1.01763	1.1312	1.097	0.9454	1.05787	1.1932	1.3202	1.1771	1.3548	1.3653	1.3474	1.293	0.8636	0.9007	1.1049	1.0673	1.013	1.077	1.00442
37.3 °C	51247s	14.2353		1.0829	0.8838	1.086	1.01757	1.1336	1.0995	0.9464	1.05983	1.194	1.3208	1.1764	1.3545	1.3659	1.3475	1.29318	0.8632	0.9017	1.1046	1.0667	1.0142	1.0766	1.0045
37.2 °C	51387s	14.2742		1.0841	0.8814	1.085	1.01683	1.139	1.1053	0.949	1.06443	1.2	1.3237	1.1783	1.357	1.3671	1.3481	1.2957	0.864	0.9011	1.1037	1.0675	1.0139	1.0764	1.00443
37.3 °C	51528s	14.3133		1.0836	0.8827	1.0848	1.01703	1.1402	1.1065	0.951	1.0659	1.1957	1.3232	1.1811	1.3555	1.367	1.3484	1.29515	0.8633	0.9	1.1036	1.0683	1.0129	1.0767	1.00413
37.3 °C	51668s	14.3522		1.0847	0.8827	1.0836	1.017	1.144	1.11	0.9531	1.06903	1.1972	1.3238	1.18	1.3541	1.3653	1.3483	1.29478	0.8634	0.9021	1.1036	1.0683	1.0131	1.0768	1.00455
37.2 °C	51808s	14.3911		1.0843	0.8844	1.085	1.0179	1.1482	1.1109	0.9548	1.0713	1.1981	1.323	1.1821	1.3543	1.3658	1.3482	1.29525	0.8633	0.9022	1.1038	1.0659	1.0147	1.0776	1.00458
37.2 °C	51949s	14.4303		1.0846	0.885	1.0845	1.01803	1.1522	1.1152	0.9564	1.0746	1.1987	1.3251	1.179	1.3553	1.3661	1.3471	1.29522	0.8636	0.9039	1.1033	1.0667	1.0156	1.0777	1.00513
37.3 °C	52089s	14.4692		1.0851	0.8842	1.0832	1.0175	1.1556	1.1181	0.9584	1.07737	1.1975	1.3253	1.1813	1.3554	1.3664	1.3474	1.29555	0.8632	0.9035	1.1022	1.0666	1.0157	1.0778	1.00483
37.2 °C	52229s	14.5081		1.0855	0.8861	1.0832	1.01827	1.1561	1.1166	0.9588	1.07717	1.2001	1.3231	1.1798	1.3546	1.3646	1.3479	1.29502	0.8625	0.9028	1.1023	1.0649	1.0153	1.0765	1.00405
37.2 °C	52370s	14.5472		1.086	0.8857	1.0829	1.0182	1.1562	1.1206	0.9606	1.07913	1.1944	1.3255	1.1774	1.3516	1.3652	1.347	1.29352	0.8634	0.9027	1.1028	1.0656	1.0147	1.0795	1.00478
37.1 °C	52510s	14.5861		1.0851	0.885	1.0834	1.01783	1.1606	1.1235	0.9623	1.08213	1.1956	1.3254	1.1769	1.3529	1.3651	1.3473	1.29387	0.8626	0.9035	1.1019	1.0665	1.0153	1.0781	1.00465
37.3 °C	52651s	14.6253		1.0867	0.8837	1.0822	1.01753	1.1631	1.1258	0.9636	1.08417	1.1974	1.3258	1.1758	1.3525	1.3644	1.3465	1.29373	0.8631	0.9048	1.1025	1.0659	1.0147	1.0785	1.00492
37.3 °C	52791s	14.6642		1.0869	0.8861	1.0821	1.01837	1.1664	1.127	0.9654	1.08627	1.1961	1.3238	1.1744	1.3528	1.3642	1.3471	1.29307	0.8636	0.9038	1.1024	1.0654	1.0153	1.0782	1.00478
37.3 °C	52931s	14.7031		1.0863	0.8866	1.0819	1.01827	1.1712	1.1294	0.966	1.08887	1.199	1.3256	1.1735	1.3542	1.3647	1.3465	1.29392	0.8633	0.9059	1.1018	1.0648	1.017	1.0781	1.00515
37.3 °C	53072s	14.7422		1.0871	0.8875	1.0815	1.0187	1.1723	1.1309	0.9678	1.09033	1.1957	1.326	1.171	1.3534	1.3644	1.3456	1.29268	0.8625	0.9052	1.1016	1.0655	1.0173	1.0798	1.00532
37.2 °C	53212s	14.7811		1.0873	0.8873	1.0819	1.01883	1.176	1.134	0.97	1.09333	1.1963	1.3253	1.1704	1.3526	1.3644	1.3461	1.29252	0.8629	0.9042	1.1017	1.0656	1.0169	1.0785	1.00497
37.3 °C	53352s	14.82		1.0871	0.8879	1.0803	1.01843	1.1831	1.136	0.9711	1.09673	1.1971	1.3253	1.1682	1.3537	1.3646	1.3458	1.29245	0.8623	0.9054	1.1008	1.0648	1.0173	1.078	1.00477
37.3 °C	53493s	14.8592		1.0868	0.8876	1.0813	1.01857	1.1858	1.1409	0.9727	1.0998	1.1936	1.3247	1.1667	1.3523	1.3649	1.3463	1.29142	0.8625	0.906	1.1021	1.063	1.0166	1.0795	1.00495
37.3 °C	53633s	14.8981		1.0865	0.8883	1.0808	1.01853	1.1956	1.1439	0.9745	1.10467	1.1989	1.3263	1.1665	1.3548	1.3651	1.3463	1.29298	0.8632	0.9066	1.1011	1.0654	1.0186	1.0784	1.00555
37.2 °C	53774s	14.9372		1.0867	0.887	1.0805	1.01807	1.1975	1.1444	0.9757	1.10587	1.1931	1.3262	1.1692	1.3517	1.3653	1.3469	1.29207	0.8623	0.9056	1.1008	1.0641	1.0184	1.0784	1.00493
37.3 °C	53914s	14.9761		1.0867	0.8885	1.0806	1.0186	1.197	1.1477	0.9772	1.1073	1.1945	1.3271	1.1655	1.3511	1.3646	1.3461	1.29148	0.8628	0.907	1.1008	1.0628	1.019	1.0795	1.00532
37.2 °C	54054s	15.015		1.0876	0.8878	1.0798	1.0184	1.1993	1.1493	0.9794	1.10933	1.1945	1.3282	1.1649	1.3523	1.3636	1.3462	1.29162	0.8628	0.9049	1.1001	1.0654	1.0162	1.0788	1.0047
37.2 °C	54195s	15.0542		1.0864	0.8885	1.0793	1.01807	1.2016	1.1528	0.9813	1.1119	1.195	1.3292	1.1631	1.3519	1.3641	1.345	1.29138	0.8634	0.9078	1.0998	1.0634	1.0194	1.0782	1.00533
37.3 °C	54335s	15.0931		1.0871	0.8874	1.0799	1.01813	1.2005	1.1534	0.9811	1.11167	1.1935	1.3312	1.1609	1.3502	1.3627	1.3444	1.29048	0.8633	0.9058	1.0995	1.0639	1.0175	1.0785	1.00475
37.2 °C	54475s	15.1319		1.0859	0.8883	1.0796	1.01793	1.203	1.1548	0.9834	1.11373	1.1919	1.3305	1.1624	1.3513	1.3626	1.3456	1.29072	0.8632	0.9062	1.1	1.0621	1.0187	1.0786	1.0048
37.2 °C	54616s	15.1711		1.0857	0.8886	1.0791	1.0178	1.2072	1.1583	0.9855	1.117	1.1955	1.3304	1.1603	1.3515	1.3612	1.3457	1.29077	0.8631	0.9081	1.0992	1.0621	1.0201	1.0778	1.00507
37.3 °C	54756s	15.21		1.0862	0.892	1.0792	1.01913	1.2059	1.1599	0.9854	1.11707	1.1912	1.3323	1.1586	1.3502	1.3621	1.3463	1.29012	0.8644	0.9063	1.0993	1.0636	1.0184	1.0783	1.00505
37.3 °C	54897s	15.2492		1.0853	0.8894	1.0787	1.0178	1.2085	1.1629	0.9858	1.11907	1.1923	1.3317	1.1579	1.3503	1.3608	1.3463	1.28988	0.8651	0.9078	1.0989	1.0615	1.0202	1.0787	1.00537
37.3 °C	55037s	15.2881		1.0855	0.8915	1.0783	1.01843	1.2115	1.1657	0.9865	1.12123	1.1909	1.3317	1.155	1.3511	1.3624	1.3485	1.28993	0.8663	0.9062	1.0982	1.062	1.0184	1.0776	1.00478
37.2 °C	55177s	15.3269		1.085	0.8918	1.0783	1.01837	1.2165	1.166	0.9875	1.12333	1.1916	1.3327	1.1521	1.3502	1.3613	1.3476	1.28925	0.8664	0.9074	1.0986	1.0603	1.0196	1.0771	1.0049
37.3 °C	55318s	15.3661		1.0851	0.8896	1.0771	1.01727	1.2205	1.1688	0.9881	1.1258	1.19	1.3362	1.154	1.3505	1.3636	1.3492	1.29058	0.867	0.9084	1.0991	1.061	1.021	1.0777	1.0057
37.1 °C	55458s	15.405		1.0852	0.8898	1.0777	1.01757	1.2174	1.1721	0.9897	1.1264	1.1871	1.3358	1.1501	1.3482	1.3642	1.35	1.28923	0.8681	0.9072	1.0982	1.0617	1.019	1.0771	1.00522
37.2 °C	55598s	15.4439		1.0847	0.8908	1.0772	1.01757	1.2195	1.172	0.9904	1.1273	1.191	1.3353	1.149	1.35	1.3632	1.3502	1.28978	0.8679	0.9094	1.0974	1.0603	1.0206	1.0767	1.00538
37.3 °C	55739s	15.4831		1.0843	0.8877	1.0772	1.0164	1.2204	1.1737	0.9917	1.1286	1.1873	1.3367	1.1501	1.3475	1.3647	1.3504	1.28945	0.8682	0.9062	1.0977	1.0624	1.0186	1.0781	1.0052
37.2 °C	55879s	15.5219		1.084	0.8897	1.0761	1.0166	1.2222	1.1734	0.9933	1.12963	1.1899	1.3376	1.1498	1.348	1.365	1.3506	1.29015	0.8684	0.9073	1.0976	1.0598	1.0195	1.0759	1.00475
37.2 °C	56020s	15.5611		1.0836	0.89	1.0766	1.01673	1.2249	1.1751	0.9945	1.1315	1.192	1.3358	1.1492	1.3492	1.365	1.3529	1.29068	0.8682	0.9087	1.0969	1.0584	1.0199	1.0763	1.00473
37.3 °C	56160s	15.6		1.0837	0.8906	1.0761	1.0168	1.226	1.1781	0.9954	1.13317	1.1854	1.3367	1.1457	1.3469	1.3666	1.3533	1.2891	0.868	0.9079	1.0976	1.0595	1.0187	1.0766	1.00472
37.2 °C	56300s	15.6389		1.0837	0.8882	1.0762	1.01603	1.2262	1.1781	0.9965	1.1336	1.1867	1.3403	1.1478	1.3487	1.3684	1.3549	1.29113	0.8674	0.9077	1.097	1.059	1.0183	1.076	1.00423
37.3 °C	56441s	15.6781		1.0829	0.8907	1.0753	1.0163	1.2291	1.1773	0.9974	1.1346	1.1884	1.3401	1.1494	1.3498	1.3697	1.3566	1.29233	0.8674	0.908	1.0968	1.0583	1.0182	1.0758	1.00408
37.2 °C	56581s	15.7169		1.0831	0.8901	1.074	1.01573	1.2314	1.1792	0.9986	1.1364	1.1901	1.3403	1.1469	1.3497	1.3699	1.3558	1.29212	0.8673	0.9072	1.0954	1.0589	1.0181	1.0743	1.00353
37.3 °C	56721s	15.7558		1.083	0.8908	1.0742	1.016	1.2316	1.1787	0.9998	1.1367	1.1856	1.3403	1.1444	1.3474	1.3693	1.3551	1.29035	0.8673	0.9086	1.0959	1.0581	1.0186	1.0746	1.00385
37.3 °C	56862s	15.795		1.0826	0.89	1.0751	1.0159	1.2328	1.1768	1.001	1.13687	1.1845	1.3405	1.1453	1.3464	1.369	1.3555	1.2902	0.866	0.9084	1.0954	1.0572	1.0176	1.0752	1.0033
37.2 °C	57002s	15.8339		1.0825	0.89	1.0736	1.01537	1.2359	1.1798	1.002	1.13923	1.187	1.3407	1.142	1.3461	1.3695	1.3557	1.29017	0.8656	0.9087	1.096	1.058	1.0181	1.075	1.00357
37.2 °C	57142s	15.8728		1.0825	0.89	1.073	1.01517	1.2381	1.1801	1.0034	1.14053	1.1885	1.3405	1.1416	1.3475	1.3704	1.3565	1.29083	0.8664	0.9086	1.095	1.0583	1.0179	1.0738	1.00333
37.3 °C	57283s	15.9119		1.0821	0.8913	1.0739	1.01577	1.2377	1.1775	1.0032	1.13947	1.1858	1.3407	1.1397	1.3458	1.3687	1.3561	1.28947	0.8649	0.908	1.0948	1.0565	1.0182	1.0737	1.00268
37.3 °C	57423s	15.9508		1.0819	0.8918	1.0737	1.0158	1.2406	1.1814	1.0043	1.1421	1.184	1.3418	1.1403	1.3449	1.3709	1.3566	1.28975	0.8648	0.9085	1.0955	1.056	1.0169	1.0754	1.00285
37.3 °C	57564s	15.99		1.0803	0.8934	1.0722	1.0153	1.2423	1.1803	1.0042	1.14227	1.1852	1.3416	1.1387	1.345	1.3696	1.357	1.28952	0.8643	0.9091	1.0939	1.0553	1.0183	1.0733	1.00237
37.3 °C	57704s	16.0289		1.0806	0.8938	1.0728	1.01573	1.244	1.1814	1.0051	1.1435	1.1822	1.3413	1.1348	1.3448	1.3712	1.3563	1.28843	0.8641	0.909	1.0949	1.0557	1.0174	1.074	1.00252
37.3 °C	57844s	16.0678		1.0811	0.8955	1.0719	1.01617	1.2445	1.18	1.0057	1.1434	1.1808	1.3412	1.1398	1.3445	1.3703	1.3564	1.28883	0.8632	0.9087	1.0936	1.0564	1.017	1.0732	1.00202
37.3 °C	57985s	16.1069		1.0807	0.8987	1.0739	1.01777	1.2471	1.1789	1.0053	1.14377	1.1828	1.3414	1.1351	1.344	1.3709	1.3564	1.28843	0.8626	0.9085	1.0939	1.0547	1.0175	1.0741	1.00188
37.3 °C	58125s	16.1458		1.0813	0.9	1.072	1.01777	1.2487	1.1792	1.006	1.14463	1.1819	1.3421	1.1324	1.343	1.3704	1.3565	1.28772	0.8625	0.9082	1.0929	1.0571	1.0171	1.0727	1.00175
37.3 °C	58265s	16.1847		1.0804	0.9017	1.0712	1.01777	1.2518	1.1792	1.0052	1.1454	1.1822	1.3423	1.134	1.3423	1.3695	1.3563	1.28777	0.8629	0.9084	1.0934	1.0557	1.0157	1.0734	1.00158
37.1 °C	58406s	16.2239		1.0799	0.9051	1.0717	1.0189	1.2575	1.1794	1.0063	1.14773	1.186	1.3414	1.1271	1.3467	1.3709	1.3573	1.28823	0.8609	0.9092	1.0932	1.0537	1.0165	1.0727	1.00103
37.1 °C	58546s	16.2628		1.0811	0.9077	1.0717	1.02017	1.2562	1.184	1.0072	1.14913	1.1811	1.3432	1.1289	1.345	1.3725	1.3577	1.28807	0.8609	0.9094	1.0932	1.0567	1.0173	1.0726	1.00168
37.3 °C	58687s	16.3019		1.0806	0.9089	1.0703	1.01993	1.2563	1.1843	1.0068	1.14913	1.1792	1.3422	1.128	1.3438	1.3716	1.3574	1.28703	0.861	0.9096	1.0921	1.0558	1.0157	1.0709	1.00085
37.3 °C	58827s	16.3408		1.0818	0.9106	1.0698	1.02073	1.2578	1.1851	1.0068	1.1499	1.1793	1.3419	1.1249	1.3455	1.3709	1.3563	1.28647	0.8604	0.9097	1.0919	1.0572	1.0152	1.0724	1.00113
37.4 °C	58967s	16.3797		1.0826	0.9124	1.0704	1.0218	1.2596	1.1857	1.0064	1.15057	1.1829	1.3415	1.1249	1.3446	1.3698	1.3557	1.28657	0.8595	0.9109	1.092	1.0597	1.0163	1.0712	1.0016
37.2 °C	59108s	16.4189		1.0832	0.9129	1.07	1.02203	1.2601	1.1837	1.0081	1.15063	1.1759	1.3409	1.1235	1.3442	1.3696	1.3573	1.28523	0.8585	0.9121	1.0917	1.0596	1.0144	1.0714	1.00128
37.3 °C	59248s	16.4578		1.0842	0.9161	1.0704	1.02357	1.2633	1.1846	1.0086	1.15217	1.1803	1.3426	1.1218	1.3452	1.371	1.3571	1.28633	0.8586	0.9137	1.0913	1.0629	1.0157	1.0713	1.00225
37.3 °C	59388s	16.4967		1.0841	0.915	1.0712	1.02343	1.264	1.1865	1.0085	1.153	1.1815	1.3416	1.123	1.3452	1.3704	1.3564	1.28635	0.8576	0.9149	1.0923	1.0609	1.0143	1.0717	1.00195
37.2 °C	59529s	16.5358		1.0844	0.9181	1.0695	1.024	1.2649	1.1862	1.0078	1.15297	1.1805	1.3407	1.1185	1.3463	1.3703	1.3563	1.28543	0.8566	0.9187	1.0915	1.0616	1.0158	1.0706	1.00247
37.2 °C	59669s	16.5747		1.086	0.9181	1.0701	1.02473	1.2656	1.1871	1.0094	1.15403	1.1808	1.3425	1.118	1.3464	1.371	1.3569	1.28593	0.857	0.9201	1.0918	1.0646	1.0138	1.0708	1.00302
37.2 °C	59810s	16.6139		1.0863	0.9179	1.0704	1.02487	1.2672	1.185	1.0095	1.1539	1.1819	1.3413	1.1158	1.3453	1.3696	1.3556	1.28492	0.8559	0.9225	1.0907	1.066	1.0145	1.0707	1.00338
37.3 °C	59950s	16.6528		1.0872	0.919	1.0709	1.0257	1.27	1.1865	1.0101	1.15553	1.1834	1.3407	1.1152	1.3459	1.3682	1.3551	1.28475	0.8556	0.9246	1.0903	1.0674	1.0142	1.0707	1.0038
37.2 °C	60090s	16.6917		1.0876	0.9192	1.0731	1.02663	1.2693	1.1882	1.011	1.15617	1.179	1.3398	1.1123	1.3447	1.3683	1.3543	1.28307	0.8545	0.9273	1.0911	1.0685	1.0144	1.071	1.00447
37.3 °C	60231s	16.7308		1.0889	0.9216	1.0725	1.02767	1.2713	1.1896	1.0125	1.1578	1.1821	1.3407	1.1082	1.3458	1.3691	1.3552	1.28352	0.8547	0.9304	1.0897	1.0708	1.0149	1.0703	1.00513
37.2 °C	60371s	16.7697		1.0895	0.9207	1.0727	1.02763	1.2726	1.1905	1.0135	1.15887	1.1846	1.3411	1.1116	1.3468	1.3696	1.3555	1.28487	0.8537	0.9313	1.09	1.0725	1.0139	1.0705	1.00532
37.2 °C	60511s	16.8086		1.0896	0.9218	1.0733	1.02823	1.2732	1.1902	1.0145	1.1593	1.1854	1.3404	1.1062	1.3473	1.3696	1.3546	1.28392	0.8533	0.9339	1.09	1.0721	1.0142	1.0696	1.00552
37.3 °C	60652s	16.8478		1.0898	0.9223	1.0732	1.02843	1.2739	1.1916	1.016	1.1605	1.1827	1.3402	1.1074	1.3463	1.3686	1.355	1.28337	0.8523	0.9358	1.0897	1.0716	1.0139	1.0693	1.00543
37.3 °C	60792s	16.8867		1.09	0.9216	1.0745	1.0287	1.2795	1.1949	1.0176	1.164	1.1906	1.3409	1.1073	1.349	1.3699	1.3554	1.28552	0.8524	0.9382	1.0889	1.0747	1.0143	1.0686	1.00618
37.3 °C	60933s	16.9258		1.0913	0.9213	1.075	1.0292	1.2789	1.1924	1.0167	1.16267	1.1878	1.3394	1.1053	1.3479	1.3687	1.3551	1.28403	0.8517	0.9375	1.0887	1.0755	1.0133	1.0689	1.00593
37.2 °C	61073s	16.9647		1.0912	0.9219	1.0755	1.02953	1.2808	1.1904	1.0207	1.16397	1.188	1.3382	1.1069	1.3478	1.367	1.3554	1.28388	0.8508	0.9409	1.0887	1.0759	1.0137	1.0693	1.00655
37.3 °C	61213s	17.0036		1.0917	0.9204	1.0758	1.0293	1.2827	1.195	1.0214	1.16637	1.19	1.3384	1.1009	1.3495	1.3688	1.3556	1.28387	0.851	0.9399	1.089	1.0766	1.0124	1.0684	1.00622
37.3 °C	61354s	17.0428		1.0922	0.9228	1.0761	1.03037	1.2819	1.1942	1.0179	1.16467	1.1918	1.341	1.1034	1.3487	1.37	1.3552	1.28502	0.8503	0.9409	1.088	1.0783	1.0128	1.0678	1.00635
37.3 °C	61494s	17.0817		1.0926	0.9206	1.0766	1.02993	1.2809	1.1962	1.0182	1.1651	1.187	1.3405	1.1027	1.3473	1.3685	1.3547	1.28345	0.8496	0.9411	1.0881	1.08	1.0133	1.0679	1.00667
37.3 °C	61634s	17.1206		1.0928	0.9206	1.0766	1.03	1.2839	1.1961	1.0202	1.16673	1.1868	1.3393	1.1007	1.3479	1.3687	1.3546	1.283	0.8494	0.9416	1.0879	1.08	1.0134	1.0668	1.00652
37.2 °C	61775s	17.1597		1.0927	0.92	1.0779	1.0302	1.2853	1.1934	1.0218	1.16683	1.1915	1.3376	1.1007	1.3477	1.3674	1.354	1.28315	0.8487	0.9424	1.0885	1.0783	1.0148	1.0677	1.00673
37.3 °C	61915s	17.1986		1.0925	0.9199	1.0775	1.02997	1.2866	1.1972	1.021	1.16827	1.1905	1.339	1.0972	1.3485	1.3687	1.3551	1.28317	0.8484	0.9434	1.088	1.081	1.0153	1.067	1.00718
37.3 °C	62055s	17.2375		1.0932	0.9221	1.0776	1.03097	1.2861	1.1966	1.0172	1.16663	1.1877	1.338	1.0964	1.3467	1.3675	1.3541	1.28173	0.8474	0.9438	1.0872	1.081	1.0175	1.0666	1.00725
37.3 °C	62196s	17.2767		1.0925	0.9189	1.0787	1.03003	1.2859	1.1961	1.0164	1.16613	1.1862	1.3379	1.0965	1.3448	1.3667	1.3526	1.28078	0.847	0.9442	1.087	1.0817	1.0177	1.067	1.00743
37.3 °C	62336s	17.3156		1.0926	0.92	1.0793	1.03063	1.2886	1.1991	1.0182	1.16863	1.1889	1.3385	1.0939	1.3452	1.3672	1.3524	1.28102	0.8462	0.9437	1.0875	1.0815	1.0189	1.0675	1.00755
37.3 °C	62477s	17.3547		1.0932	0.9183	1.0797	1.0304	1.291	1.1961	1.0179	1.16833	1.1872	1.3368	1.0891	1.3456	1.3668	1.3523	1.27963	0.8452	0.9445	1.0875	1.0823	1.021	1.067	1.00792
37.2 °C	62617s	17.3936		1.0933	0.918	1.0798	1.03037	1.2931	1.1971	1.0187	1.16963	1.1911	1.3383	1.0903	1.3455	1.3655	1.3519	1.28043	0.8455	0.9445	1.0878	1.0837	1.0217	1.0661	1.00822
37.3 °C	62757s	17.4325		1.0926	0.9187	1.0801	1.03047	1.2928	1.1991	1.0213	1.17107	1.1873	1.337	1.0882	1.3453	1.3661	1.3517	1.27927	0.8449	0.9438	1.0877	1.0823	1.0221	1.066	1.0078
37.2 °C	62898s	17.4717		1.0923	0.918	1.0804	1.03023	1.2931	1.197	1.0273	1.17247	1.1893	1.3363	1.0884	1.3466	1.3656	1.3515	1.27962	0.8443	0.9441	1.0884	1.0833	1.0243	1.0668	1.00853
37.3 °C	63038s	17.5106		1.0927	0.9177	1.0808	1.0304	1.2959	1.1975	1.0304	1.1746	1.1903	1.3359	1.087	1.3468	1.3659	1.3515	1.27957	0.8435	0.944	1.0883	1.0842	1.0252	1.0662	1.00857
37.4 °C	63178s	17.5494		1.0918	0.9161	1.0809	1.0296	1.2959	1.1975	1.0307	1.1747	1.1895	1.3347	1.0882	1.3448	1.3647	1.351	1.27882	0.8433	0.9436	1.0888	1.0826	1.0257	1.0659	1.00832
37.3 °C	63319s	17.5886		1.0921	0.9176	1.0814	1.03037	1.2998	1.1966	1.031	1.1758	1.1926	1.3341	1.0837	1.3461	1.3633	1.3497	1.27825	0.8426	0.944	1.0899	1.0817	1.028	1.0653	1.00858
37.3 °C	63459s	17.6275		1.0924	0.918	1.0814	1.0306	1.2992	1.1985	1.0269	1.17487	1.1869	1.3355	1.083	1.345	1.3652	1.3513	1.27782	0.8424	0.9438	1.0904	1.0824	1.0291	1.0651	1.00887
37.3 °C	63600s	17.6667		1.0922	0.9175	1.0814	1.03037	1.3011	1.1971	1.0227	1.17363	1.1901	1.3351	1.0816	1.3444	1.3651	1.3506	1.27782	0.8414	0.9439	1.0908	1.0826	1.0298	1.0655	1.009
37.3 °C	63740s	17.7056		1.0929	0.9171	1.0809	1.0303	1.3034	1.1959	1.0188	1.1727	1.1922	1.3344	1.0801	1.3458	1.3645	1.3495	1.27775	0.8413	0.9438	1.0903	1.0827	1.031	1.0634	1.00875
37.3 °C	63880s	17.7444		1.0917	0.9172	1.0809	1.02993	1.3034	1.1976	1.0166	1.17253	1.189	1.3328	1.076	1.3443	1.3622	1.349	1.27555	0.8406	0.9428	1.0912	1.0832	1.0307	1.0644	1.00882
37.3 °C	64021s	17.7836		1.0914	0.9159	1.0797	1.029	1.3046	1.1941	1.0161	1.1716	1.1933	1.3334	1.0787	1.3457	1.363	1.3501	1.27737	0.8404	0.9431	1.091	1.0822	1.0333	1.0638	1.00897
37.2 °C	64161s	17.8225		1.0918	0.9147	1.0814	1.0293	1.3049	1.1967	1.0138	1.1718	1.1896	1.3337	1.0756	1.344	1.3635	1.3481	1.27575	0.8389	0.9429	1.0927	1.0819	1.0335	1.0656	1.00925
37.3 °C	64301s	17.8614		1.0912	0.916	1.08	1.02907	1.307	1.1973	1.0132	1.1725	1.1937	1.3335	1.081	1.3449	1.3637	1.3496	1.27773	0.839	0.9431	1.0919	1.0826	1.0339	1.0648	1.00922
37.3 °C	64442s	17.9006		1.0909	0.9131	1.0807	1.02823	1.3065	1.1968	1.0115	1.1716	1.1883	1.3322	1.0762	1.3433	1.3622	1.3486	1.27513	0.8385	0.9421	1.0926	1.0808	1.0346	1.0655	1.00902
37.3 °C	64582s	17.9394		1.0912	0.9146	1.08	1.0286	1.3072	1.1985	1.0097	1.1718	1.1896	1.3336	1.0741	1.3432	1.3637	1.3483	1.27542	0.8386	0.9423	1.0928	1.0818	1.0353	1.0656	1.0094
37.2 °C	64723s	17.9786		1.0901	0.915	1.0801	1.0284	1.3093	1.197	1.0098	1.17203	1.1983	1.3338	1.0776	1.346	1.3628	1.3495	1.278	0.8379	0.9419	1.0925	1.0819	1.0362	1.0659	1.00938
	06072017-005.wsp
