# Supplementary material for: Pleiotropy complicates a trade-off between phage resistance and antibiotic resistance
Source: Proc Natl Acad Sci U S A. 2020 May 18;117(21):11207–16. doi: 10.1073/pnas.1919888117 (PMC7260982; doi:10.1073/pnas.1919888117)
Supplement: Supplementary File [file pnas.1919888117.sd05.xlsx]

## Sheet: Sheet1
phage_stock	assay_date	bacteria	ml_spotted	n_plaques	dilution	pfu_per_ml	TR_n_plaques	TR_dilution	TR_pfu_per_ml	avg_pfu/ml	avg_eop	phage
U136B_1	Fall 2018	KJC9	0.002	1	1e-08	50000000000	2	1e-08	100000000000	75000000000	1	U136B
U136B_2	Fall 2018	KJC9	0.002	1	1e-08	50000000000	5	1e-07	25000000000	37500000000	1	U136B
U136B_3	Fall 2018	KJC9	0.002	4	1e-07	20000000000	1	1e-08	50000000000	35000000000	1	U136B
U136B_1	Fall 2018	rfaB	0.002	1	1e-08	50000000000	6	1e-07	30000000000	40000000000	0.667	U136B
U136B_2	Fall 2018	rfaB	0.002	2	1e-07	10000000000	3	1e-07	15000000000	12500000000	0.267	U136B
U136B_3	Fall 2018	rfaB	0.002	4	1e-08	200000000000	5	1e-07	25000000000	113000000000	5.71	U136B
U136B_1	Fall 2018	rfaC	0.002	0	0	0	0	0	0			U136B
U136B_2	Fall 2018	rfaC	0.002	0	0	0	0	0	0			U136B
U136B_3	Fall 2018	rfaC	0.002	0	0	0	0	0	0			U136B
U136B_1	Fall 2018	rfaD	0.002	0	0	0	0	0	0			U136B
U136B_2	Fall 2018	rfaD	0.002	0	0	0	0	0	0			U136B
U136B_3	Fall 2018	rfaD	0.002	0	0	0	0	0	0			U136B
U136B_1	Fall 2018	rfaE	0.002	0	0	0	0	0	0			U136B
U136B_2	Fall 2018	rfaE	0.002	0	0	0	0	0	0			U136B
U136B_3	Fall 2018	rfaE	0.002	0	0	0	0	0	0			U136B
U136B_1	Fall 2018	rfaF	0.002	10	1e-06	5000000000	1	1e-07	5000000000	5000000000	0.0667	U136B
U136B_2	Fall 2018	rfaF	0.002	1	1e-08	50000000000	1	1e-07	5000000000	27500000000	0.733	U136B
U136B_3	Fall 2018	rfaF	0.002	1	1e-08	50000000000	1	1e-07	5000000000	27500000000	0.786	U136B
U136B_1	Fall 2018	rfaG	0.002	2	1e-07	10000000000	4	1e-06	2000000000	6000000000	0.08	U136B
U136B_2	Fall 2018	rfaG	0.002	3	1e-07	15000000000	1	1e-07	5000000000	10000000000	0.267	U136B
U136B_3	Fall 2018	rfaG	0.002	2	1e-06	1000000000	1	1e-07	5000000000	3000000000	0.0857	U136B
U136B_1	Fall 2018	rfaH	0.002	2	1e-07	10000000000	3	1e-06	1500000000	5750000000	0.0767	U136B
U136B_2	Fall 2018	rfaH	0.002	5	1e-06	2500000000	2	1e-07	10000000000	6250000000	0.167	U136B
U136B_3	Fall 2018	rfaH	0.002	2	1e-06	1000000000	5	6.01e-06	416000000	708000000	0.0202	U136B
U136B_1	Fall 2018	rfaI	0.002	1	1e-08	50000000000	6	1e-07	30000000000	40000000000	0.533	U136B
U136B_2	Fall 2018	rfaI	0.002	1	1e-08	50000000000	1	1e-08	50000000000	50000000000	1.33	U136B
U136B_3	Fall 2018	rfaI	0.002	3	1e-07	15000000000	4	1e-07	20000000000	17500000000	0.5	U136B
U136B_1	Fall 2018	rfaJ	0.002	5	1e-07	25000000000	1	1e-08	50000000000	37500000000	0.333	U136B
U136B_2	Fall 2018	rfaJ	0.002	1	1e-08	50000000000	1	1e-08	50000000000	50000000000	1.33	U136B
U136B_3	Fall 2018	rfaJ	0.002	5	1e-07	25000000000	1	1e-07	5000000000	15000000000	0.714	U136B
U136B_1	Fall 2018	rfaL	0.002	3	1e-08	150000000000	5	1e-07	25000000000	87500000000	2	U136B
U136B_2	Fall 2018	rfaL	0.002	1	1e-08	50000000000	3	1e-07	15000000000	32500000000	1.33	U136B
U136B_3	Fall 2018	rfaL	0.002	4	1e-07	20000000000	3	1e-07	15000000000	17500000000	0.571	U136B
U136B_1	Fall 2018	rfaP	0.002	0	0	0	0	0	0			U136B
U136B_2	Fall 2018	rfaP	0.002	0	0	0	0	0	0			U136B
U136B_3	Fall 2018	rfaP	0.002	0	0	0	0	0	0			U136B
U136B_1	Fall 2018	rfaQ	0.002	4	1e-07	20000000000	3	1e-07	15000000000	17500000000	0.233	U136B
U136B_2	Fall 2018	rfaQ	0.002	1	1e-07	5000000000	2	1e-07	10000000000	7500000000	0.2	U136B
U136B_3	Fall 2018	rfaQ	0.002	2	1e-07	10000000000	3	1e-07	15000000000	12500000000	0.357	U136B
U136B_1	Fall 2018	rfaS	0.002	3	1e-07	15000000000	2	1e-08	100000000000	57500000000	0.767	U136B
U136B_2	Fall 2018	rfaS	0.002	3	1e-07	15000000000	3	1e-07	15000000000	15000000000	0.4	U136B
U136B_3	Fall 2018	rfaS	0.002	4	1e-07	20000000000	2	1e-08	100000000000	60000000000	1.71	U136B
U136B_1	Fall 2018	rfaY	0.002	2	1e-07	10000000000	3	1e-08	150000000000	80000000000	1.07	U136B
U136B_2	Fall 2018	rfaY	0.002	3	1e-07	15000000000	2	1e-07	10000000000	12500000000	0.333	U136B
U136B_3	Fall 2018	rfaY	0.002	1	1e-08	50000000000	1	1e-08	50000000000	50000000000	1.43	U136B
U136B_1	Fall 2018	rfaZ	0.002	2	1e-07	10000000000	1	1e-07	5000000000	7500000000	0.1	U136B
U136B_2	Fall 2018	rfaZ	0.002	1	1e-07	5000000000	5	1e-08	250000000000	128000000000	3.4	U136B
U136B_3	Fall 2018	rfaZ	0.002	1	1e-07	5000000000	1	1e-08	50000000000	27500000000	0.786	U136B
